# Supplementary material for: Ozone Response to Emission Reductions in the Southeastern United States
Source: Copernicus journal article supplement (doi:10.5194/acp-2017-534), 2017-08-08
Supplement: Supplementary file 1 [file acp-2017-534-supplement.pdf]

Supplement for

# Ozone Response to Emission Reductions in the Southeastern United States

Charles L. Blanchard<sup>1</sup> and George M. Hidy<sup>2</sup>

<sup>1</sup> Envair, 526 Cornell Ave, Albany, CA 94706

<sup>2</sup> Envair/Aerochem, 6 Evergreen Dr, Placitas, NM 87043

## Contents of this file

Tables S1 to S5, Figures S1 to S20

This supplement presents tables and figures that document measurement methods and site locations. It also shows figures that are complementary to those of the main article, including comparisons of measurements for consistency, time series of data using different metrics, and complementary analyses based on measurements of other chemical species.

## Supplement References

- Hidy, G. M. and C. L. Blanchard: Precursor reductions and ground-level ozone in the continental U.S., *J. Air Waste Manage. Assoc.*, doi: 10.1080/10962247.2015.1079564.  
<http://dx.doi.org/10.1080/10962247.2015.1079564> (last access August 19, 2015), 2015.
- Hidy, G., C. Blanchard, K. Baumann, E. Edgerton, S. Tanenbaum, S. Shaw, E. Knipping, I. Tombach, J. Jansen and J. Walters: Chemical climatology of the southeastern United States, 1999-2013, *Atmos. Chem. Phys.*, 14, 11893-11914, 2014.
- Pollack, I., T. Ryerson, M. Trainer, J. Neuman, J. Roberts, and D. Parrish: Trends in ozone its precursors and related secondary oxidation products in Los Angeles, California: a synthesis of measurements from 1960-2010, *J. Geophys. Res. Atmos.*, 118, 5891-5911, 2013.

**Table S1.** Basic measurements at SEARCH sites from 1999-2014 (Hidy et al., 2014). Sites having instrument differences are noted under “Comments.” Operations began at CTR, OAK, and YRK in 1992. PNS, OAK, and GFP were decommissioned at the end of 2009, 2010, and 2012, respectively; other sites decommissioned during 2016.

a. Continuous meteorology at SEARCH sites (5- and 60-minute reporting intervals).

| Parameter                         | Method                   | Instrument            | Sampling Height (magl) | Comments                                   |
|-----------------------------------|--------------------------|-----------------------|------------------------|--------------------------------------------|
| Temperature                       | platinum RTD             | Vaisala HMT3303       | 2                      | 2m added in 2011                           |
|                                   |                          | Paroscientific Met 4B | 9                      |                                            |
| Relative humidity                 | thin film capacitance    | Vaisala HMT3303       | 2                      | 2m added in 2011                           |
|                                   |                          | Paroscientific Met 4B | 9                      |                                            |
| Barometric pressure               | quartz crystal resonator | Paroscientific Met 4B | 9                      |                                            |
| Surface wetness                   | conductivity             | Decagon LSW-1         | 2                      | Added in 2011                              |
| Wind Speed/Direction              | sonic anemometer         | RMYoung 8100          | 10                     |                                            |
|                                   |                          |                       |                        |                                            |
| Solar Radiation (PAR)             | pyranometer              | Licor-200X            | 2                      |                                            |
| Precipitation                     | gravimetry               | ETI NOAA-IV           | 2                      |                                            |
| Aerosol/cloud layers/mixing depth | laser ceilometer         | JenOptik CHM 15k      | 50-15,000              | GFP and OLF 2012-13<br>CTR and BHM 2013-14 |

b. Continuous trace gases at SEARCH sites (5- and 60-minute reporting intervals).

| Parameter           | Method <sup>a</sup>                             | Instrument                | Sampling Hgt. (m agl) | Comments                   |
|---------------------|-------------------------------------------------|---------------------------|-----------------------|----------------------------|
| O <sub>3</sub>      | UV absorption                                   | Thermo-Scientific 49S/i   | 10                    | 1992 or ≥1999 <sup>b</sup> |
| CO                  | NDIR                                            | Thermo-Scientific 48ctl/i | 10                    | 1992 or ≥1999 <sup>b</sup> |
| SO <sub>2</sub>     | Pulsed UV fluorescence                          | Thermo-Scientific 43ctl/i | 10                    | 1992 or ≥1999 <sup>b</sup> |
| NO, NO <sub>y</sub> | Mo reduction/CL                                 | Thermo-Scientific 42ctl/i | 10                    | 1992 or ≥1999 <sup>b</sup> |
| NO <sub>2</sub>     | Photolysis/CL                                   | Thermo-Scientific 42ctl/i | 10                    | 1997 or 2001 <sup>c</sup>  |
| HNO <sub>3</sub>    | Denuder difference/Mo reduction/CL              | Thermo-Scientific 42ctl/i | 10                    | 1996 or ≥1999 <sup>d</sup> |
| PANS/Alkyl nitrates | Thermal decomposition/Blue LED photolysis/CL    | Thermo-Scientific 42i     | 5                     | CTR only, starting 6/13    |
| NH <sub>3</sub>     | Denuder difference/Pt oxidation/Mo reduction/CL | Thermo-Scientific 42i     | 5                     | Added in 2007              |

a. CL=NO-O<sub>3</sub> chemiluminescence

b. CTR, OAK, and YRK O<sub>3</sub>, CO, SO<sub>2</sub>, NO, and NO<sub>y</sub> sampling started in 1992; other sites started 1999 – 2001

c. NO<sub>2</sub> started in 1997 at CTR and YRK; 2001 at other sites. Photolysis method changed from 300 W xenon lamp through 2001 to 200 W mercury lamp between 2002 and 2007 to blue LED beginning in 2008 (Hansen et al., 2006)

d. HNO<sub>3</sub> sampling started 1996 at CTR, OAK, and YRK; 1999 – 2002 at other sites. Difference between NO<sub>y</sub> and denuded NO<sub>y</sub>

**Table S2.** Regional comparisons of anthropogenic emissions and ambient ozone trends.

| Location      | Period      | NO <sub>x</sub><br>Emission<br>Decrease     | VOC<br>Emission<br>Decrease                 | Ozone<br>Decrease <sup>a</sup> | Reference                                                     |
|---------------|-------------|---------------------------------------------|---------------------------------------------|--------------------------------|---------------------------------------------------------------|
| Los Angeles   | 1960 – 2010 | 2.6% yr <sup>-1</sup>                       | 7.3% yr <sup>-1</sup>                       | 2.8% yr <sup>-1</sup><br>(66%) | Pollack et al. (2013) <sup>b</sup>                            |
| Los Angeles   | 1975 – 2015 | 3.2% yr <sup>-1</sup><br>(74%)              | 4.9% yr <sup>-1</sup><br>(84%)              | 2.7% yr <sup>-1</sup><br>(58%) | Hidy and Blanchard<br>(2015) <sup>c</sup>                     |
| Los Angeles   | 1990 – 2015 | 3.2% yr <sup>-1</sup><br>(74%)              | 5.9% yr <sup>-1</sup><br>(84%)              | 2.6% yr <sup>-1</sup><br>(41%) | Hidy and Blanchard<br>(2015) <sup>d</sup>                     |
| Atlanta       | 1990 – 2014 | 5.9% yr <sup>-1</sup><br>(63%)              | 2.5% yr <sup>-1</sup><br>(32%)              | 1.7% yr <sup>-1</sup>          | Hidy et al. (2014); Hidy<br>and Blanchard (2015) <sup>e</sup> |
| SEARCH<br>JST | 1999 – 2014 | 5.9% yr <sup>-1</sup><br>(63%) <sup>f</sup> | 2.5% yr <sup>-1</sup><br>(32%) <sup>f</sup> | 1.9% yr <sup>-1</sup>          | Figure 1 <sup>g</sup>                                         |
| SEARCH<br>YRK | 1992 – 2014 | 5.9% yr <sup>-1</sup><br>(63%) <sup>f</sup> | 2.5% yr <sup>-1</sup><br>(32%) <sup>f</sup> | 1.8% yr <sup>-1</sup>          | Figure 1 <sup>g</sup>                                         |
| SEARCH<br>CTR | 1992 - 2014 | 5.9% yr <sup>-1</sup><br>(63%) <sup>f</sup> | 2.5% yr <sup>-1</sup><br>(32%) <sup>f</sup> | 1.6% yr <sup>-1</sup>          | Figure 1 <sup>g</sup>                                         |

- Trend in annual maximum daily peak 8-hr O<sub>3</sub> (Pollack et al., 2013) or 4<sup>th</sup>-highest daily peak 8-hr O<sub>3</sub> (Hidy et al., 2014; Hidy and Blanchard, 2015)
- Ozone trend is for 1973 – 2010
- Emission and ozone trends are from Figure S3 of Hidy and Blanchard (2015), compiled from data reported by the California Air Resources Board for the South Coast Air Basin
- Emission trend is from Figure S3 of Hidy and Blanchard (2015) limited to 1990 – 2015 data. Ozone trend is for 1990 – 2014, from Table 2 of Hidy and Blanchard (2015). Percentage reductions are determined from the differences between starting and ending years except the 66% ozone decrease for Pollack et al. (2013) is based on their factor of 2.9 regression fit decrease
- Emission decreases are for the southeastern U.S. (AL, GA, MS, NW FL) for 1996 – 2014 (Hidy et al., 2014; Figure 9, updated to 2014). Ozone trend is for 1990 – 2014 from Table 2 of Hidy and Blanchard (2015). For Birmingham, the ozone trends is -1.2% yr<sup>-1</sup> (Hidy and Blanchard, 2015)
- Emission decreases for the southeastern U.S. (AL, GA, MS, NW FL) for 1996 – 2014 (Hidy et al., 2014; Figure 9, updated to 2014).
- Ozone trends are for the annual maximum daily peak 8-hr O<sub>3</sub> (derived from Figure 1 of the present study). Maximum ozone mixing ratios increased between 1992 and 1999; YRK and CTR trends are -2.6% y<sup>-1</sup> and -3.1% y<sup>-1</sup> and, respectively, between 1999 and 2014.

Table S3. Trends in standard deviations and ranges of monthly maxima of daily peak 8-hour O<sub>3</sub> and monthly means of 2 p.m. O<sub>3</sub> mixing ratios. Statistically significant ( $p < 0.01$ ) trends are shown in bold.

| Site | Period <sup>a</sup> | N<br>Yrs <sup>a</sup> | Trend in<br>Standard<br>Deviation of<br>Monthly<br>Maxima<br>(ppbv y <sup>-1</sup> ) <sup>b</sup> | Trend in<br>Range of<br>Monthly<br>Maxima<br>(ppbv y <sup>-1</sup> ) <sup>c</sup> | Period <sup>d</sup> | N<br>Yrs <sup>d</sup> | Trend in<br>Range of<br>Monthly<br>Means<br>(ppbv y <sup>-1</sup> ) <sup>e</sup> |
|------|---------------------|-----------------------|---------------------------------------------------------------------------------------------------|-----------------------------------------------------------------------------------|---------------------|-----------------------|----------------------------------------------------------------------------------|
| BHM  | 2005-2014           | 10                    | <b>-1.35 ± 0.31</b>                                                                               | <b>-3.66 ± 0.95</b>                                                               | 2003-2014           | 12                    | -0.97 ± 0.44                                                                     |
| CTR  | 1993-2014           | 19                    | <b>-0.58 ± 0.08</b>                                                                               | <b>-1.89 ± 0.30</b>                                                               | 1993-2014           | 20                    | <b>-0.93 ± 0.28</b>                                                              |
| GFP  | 2000-2012           | 10                    | <b>-0.48 ± 0.11</b>                                                                               | <b>-1.14 ± 0.31</b>                                                               | 2000-2011           | 9                     | -0.70 ± 0.53                                                                     |
| JST  | 1999-2014           | 15                    | <b>-0.69 ± 0.14</b>                                                                               | <b>-1.89 ± 0.54</b>                                                               | 1999-2014           | 16                    | <b>-1.80 ± 0.35</b>                                                              |
| OAK  | 1993-2010           | 17                    | -0.18 ± 0.09                                                                                      | -0.49 ± 0.35                                                                      | 1993-2010           | 17                    | -0.43 ± 0.29                                                                     |
| OLF  | 2000-2014           | 14                    | <b>-0.47 ± 0.13</b>                                                                               | <b>-1.54 ± 0.51</b>                                                               | 2000-2014           | 15                    | <b>-0.94 ± 0.29</b>                                                              |
| PNS  | 2000-2009           | 9                     | -0.67 ± 0.25                                                                                      | -2.40 ± 1.01                                                                      | 2000-2009           | 9                     | -1.15 ± 0.64                                                                     |
| YRK  | 1993-2014           | 20                    | <b>-0.67 ± 0.11</b>                                                                               | <b>-1.83 ± 0.38</b>                                                               | 1993-2014           | 21                    | <b>-1.24 ± 0.22</b>                                                              |

- Period of record and number of years with monthly maxima of daily peak 8-hour O<sub>3</sub> satisfying completeness criteria. Daily peak 8-hour O<sub>3</sub> satisfy the criterion of 18 or more sampling hours per day. Monthly maxima were treated as missing if fewer than 24 days were available with daily peak 8-hour O<sub>3</sub>. Standard deviations and ranges of monthly maxima were computed for each year having at least 9 months of non-missing monthly maxima.
- Slope of linear regression of the standard deviation of monthly maxima of daily peak 8-hour O<sub>3</sub> versus year with one standard error of the slope. Statistically significant ( $p < 0.01$ ) except at PNS and OAK; significant ( $p < 0.05$ ) at PNS, not significant ( $p > 0.05$ ) at OAK.
- Slope of linear regression of the yearly range of monthly maxima of daily peak 8-hour O<sub>3</sub> versus year with one standard error of the slope. Statistically significant ( $p < 0.01$ ) except at PNS and OAK; significant ( $p < 0.05$ ) at PNS, not significant ( $p > 0.05$ ) at OAK.
- Period of record and number of years with monthly means of 2 p.m. O<sub>3</sub> satisfying completeness criteria. Monthly means were treated as missing if fewer than 24 days were available with 2 p.m. O<sub>3</sub>. Ranges of monthly 2 p.m. means were computed for each year having at least 9 months with non-missing values.
- Slope of linear regression of the yearly range of monthly mean 2 p.m. O<sub>3</sub> versus year with one standard error of the slope. Statistically significant ( $p < 0.01$ ) at CTR, JST, OLF, and YRK; not significant ( $p > 0.05$ ) at BHM, GFP, OAK, and PNS.

Table S4. Statistical summary of regressions of 2 pm O<sub>3</sub> vs 2 pm NO<sub>z</sub>, by site and year.

| Site | Year | Count | Mean 2 pm NO <sub>z</sub> | Slope 2 pm O <sub>3</sub> vs NO <sub>z</sub> | p-Value | Intercept  | p-Value | r <sup>2</sup> |
|------|------|-------|---------------------------|----------------------------------------------|---------|------------|---------|----------------|
| BHM  | 2004 | 29    | 0.96 ± 0.28               | 5.9 ± 1.5                                    | 0.0006  | 35.4 ± 2.7 | <.0001  | 0.36           |
| BHM  | 2006 | 43    | 3.46 ± 0.27               | 9.1 ± 0.9                                    | <.0001  | 31.0 ± 3.7 | <.0001  | 0.69           |
| BHM  | 2007 | 55    | 2.62 ± 0.22               | 9.1 ± 1.1                                    | <.0001  | 35.9 ± 3.3 | <.0001  | 0.58           |
| BHM  | 2008 | 59    | 2.90 ± 0.17               | 8.5 ± 1.2                                    | <.0001  | 34.4 ± 3.9 | <.0001  | 0.48           |
| BHM  | 2009 | 56    | 2.30 ± 0.13               | 9.7 ± 1.4                                    | <.0001  | 22.2 ± 3.5 | <.0001  | 0.49           |
| BHM  | 2010 | 56    | 2.11 ± 0.12               | 11.6 ± 1.1                                   | <.0001  | 21.2 ± 2.6 | <.0001  | 0.67           |
| BHM  | 2011 | 56    | 0.98 ± 0.18               | 5.0 ± 1.9                                    | 0.0116  | 44.8 ± 3.0 | <.0001  | 0.11           |
| BHM  | 2012 | 58    | 2.19 ± 0.13               | 11.7 ± 1.6                                   | <.0001  | 27.9 ± 3.9 | <.0001  | 0.48           |
| BHM  | 2013 | 54    | 1.58 ± 0.11               | 13.1 ± 1.2                                   | <.0001  | 20.8 ± 2.1 | <.0001  | 0.70           |
| CTR  | 1997 | 48    | 2.11 ± 0.18               | 9.1 ± 1.1                                    | <.0001  | 31.6 ± 2.6 | <.0001  | 0.62           |
| CTR  | 1998 | 52    | 1.87 ± 0.14               | 11.0 ± 1.8                                   | <.0001  | 30.5 ± 3.9 | <.0001  | 0.43           |
| CTR  | 2002 | 49    | 1.71 ± 0.17               | 9.2 ± 1.2                                    | <.0001  | 38.9 ± 2.5 | <.0001  | 0.55           |
| CTR  | 2003 | 55    | 1.39 ± 0.11               | 20.2 ± 1.3                                   | <.0001  | 17.6 ± 2.1 | <.0001  | 0.82           |
| CTR  | 2004 | 42    | 0.99 ± 0.11               | 22.0 ± 1.7                                   | <.0001  | 20.9 ± 2.1 | <.0001  | 0.80           |
| CTR  | 2005 | 47    | 1.21 ± 0.12               | 17.2 ± 1.6                                   | <.0001  | 24.7 ± 2.5 | <.0001  | 0.80           |
| CTR  | 2006 | 58    | 1.34 ± 0.08               | 19.8 ± 1.8                                   | <.0001  | 32.9 ± 2.7 | <.0001  | 0.69           |
| CTR  | 2007 | 56    | 1.36 ± 0.08               | 20.6 ± 2.3                                   | <.0001  | 26.7 ± 3.5 | <.0001  | 0.59           |
| CTR  | 2008 | 61    | 1.41 ± 0.07               | 25.0 ± 1.7                                   | <.0001  | 14.0 ± 2.6 | <.0001  | 0.78           |
| CTR  | 2009 | 60    | 1.07 ± 0.04               | 21.5 ± 2.8                                   | <.0001  | 21.4 ± 3.1 | <.0001  | 0.52           |
| CTR  | 2010 | 55    | 1.21 ± 0.07               | 12.3 ± 2.1                                   | <.0001  | 26.0 ± 2.7 | <.0001  | 0.40           |
| CTR  | 2011 | 59    | 1.25 ± 0.08               | 24.3 ± 1.7                                   | <.0001  | 15.3 ± 2.3 | <.0001  | 0.79           |
| CTR  | 2012 | 59    | 1.02 ± 0.07               | 25.1 ± 2.0                                   | <.0001  | 17.8 ± 2.2 | <.0001  | 0.74           |
| CTR  | 2013 | 59    | 0.79 ± 0.04               | 25.7 ± 2.8                                   | <.0001  | 16.5 ± 2.4 | <.0001  | 0.61           |
| CTR  | 2014 | 59    | 0.84 ± 0.04               | 24.6 ± 3.6                                   | <.0001  | 17.4 ± 3.2 | <.0001  | 0.46           |
| GFP  | 2006 | 58    | 1.23 ± 0.14               | 8.6 ± 2.3                                    | 0.0004  | 39.2 ± 3.7 | <.0001  | 0.22           |
| GFP  | 2007 | 59    | 1.33 ± 0.13               | 7.8 ± 2.1                                    | 0.0004  | 38.9 ± 3.5 | <.0001  | 0.24           |
| GFP  | 2008 | 49    | 1.16 ± 0.09               | 15.2 ± 3.2                                   | <.0001  | 24.2 ± 2.4 | <.0001  | 0.71           |
| GFP  | 2009 | 53    | 1.30 ± 0.08               | 21.6 ± 1.9                                   | <.0001  | 25.8 ± 2.7 | <.0001  | 0.72           |
| GFP  | 2010 | 52    | 1.18 ± 0.09               | 15.9 ± 1.7                                   | <.0001  | 23.3 ± 2.4 | <.0001  | 0.63           |
| GFP  | 2011 | 60    | 1.12 ± 0.07               | 24.3 ± 2.0                                   | <.0001  | 19.2 ± 2.5 | <.0001  | 0.72           |
| JST  | 2001 | 60    | 8.77 ± 0.57               | 1.6 ± 0.7                                    | 0.0242  | 47.7 ± 6.6 | <.0001  | 0.09           |
| JST  | 2002 | 59    | 5.82 ± 0.36               | 4.9 ± 0.8                                    | <.0001  | 40.2 ± 4.8 | <.0001  | 0.44           |
| JST  | 2003 | 61    | 4.79 ± 0.38               | 6.6 ± 0.6                                    | <.0001  | 28.0 ± 3.3 | <.0001  | 0.70           |
| JST  | 2004 | 41    | 2.75 ± 0.38               | 4.8 ± 0.9                                    | <.0001  | 45.0 ± 3.2 | <.0001  | 0.45           |
| JST  | 2005 | 39    | 4.13 ± 0.49               | 4.5 ± 1.0                                    | <.0001  | 33.6 ± 5.0 | <.0001  | 0.36           |
| JST  | 2006 | 58    | 4.72 ± 0.38               | 7.0 ± 0.6                                    | <.0001  | 38.9 ± 3.1 | <.0001  | 0.74           |
| JST  | 2007 | 58    | 4.29 ± 0.25               | 8.0 ± 0.7                                    | <.0001  | 28.0 ± 3.3 | <.0001  | 0.70           |
| JST  | 2008 | 59    | 3.58 ± 0.24               | 9.3 ± 0.6                                    | <.0001  | 27.9 ± 2.6 | <.0001  | 0.79           |
| JST  | 2009 | 57    | 2.54 ± 0.19               | 10.3 ± 0.8                                   | <.0001  | 30.6 ± 2.4 | <.0001  | 0.75           |
| JST  | 2010 | 59    | 2.88 ± 0.14               | 12.0 ± 1.0                                   | <.0001  | 19.2 ± 3.0 | <.0001  | 0.73           |
| JST  | 2011 | 57    | 2.38 ± 0.22               | 9.4 ± 0.9                                    | <.0001  | 38.1 ± 2.7 | <.0001  | 0.65           |
| JST  | 2012 | 58    | 2.96 ± 0.15               | 14.7 ± 1.3                                   | <.0001  | 15.9 ± 4.0 | 0.0002  | 0.70           |
| JST  | 2013 | 57    | 2.18 ± 0.14               | 14.8 ± 0.9                                   | <.0001  | 11.4 ± 2.1 | <.0001  | 0.84           |
| JST  | 2014 | 61    | 2.30 ± 0.11               | 13.5 ± 1.1                                   | <.0001  | 17.4 ± 2.7 | <.0001  | 0.72           |
| OAK  | 2003 | 50    | 0.63 ± 0.05               | 29.0 ± 4.2                                   | <.0001  | 22.5 ± 3.0 | <.0001  | 0.44           |
| OAK  | 2004 | 51    | 0.80 ± 0.06               | 25.4 ± 2.6                                   | <.0001  | 18.0 ± 2.4 | <.0001  | 0.69           |
| OAK  | 2005 | 54    | 1.22 ± 0.08               | 19.7 ± 2.0                                   | <.0001  | 18.8 ± 2.7 | <.0001  | 0.66           |

| Site | Year | Count | Mean 2 pm<br>NO <sub>z</sub> | Slope 2 pm<br>O <sub>3</sub> vs NO <sub>z</sub> | p-Value | Intercept  | p-Value | r <sup>2</sup> |
|------|------|-------|------------------------------|-------------------------------------------------|---------|------------|---------|----------------|
| OAK  | 2006 | 54    | 1.38 ± 0.10                  | 11.8 ± 1.8                                      | <.0001  | 29.8 ± 2.8 | <.0001  | 0.45           |
| OAK  | 2007 | 53    | 0.85 ± 0.07                  | 27.4 ± 3.0                                      | <.0001  | 20.5 ± 2.9 | <.0001  | 0.63           |
| OAK  | 2008 | 56    | 0.59 ± 0.04                  | 35.2 ± 4.8                                      | <.0001  | 22.2 ± 3.1 | <.0001  | 0.49           |
| OAK  | 2009 | 54    | 0.87 ± 0.05                  | 22.9 ± 3.8                                      | <.0001  | 27.3 ± 3.6 | <.0001  | 0.41           |
| OAK  | 2010 | 61    | 0.61 ± 0.04                  | 18.4 ± 2.5                                      | <.0001  | 22.2 ± 1.7 | <.0001  | 0.49           |
| OLF  | 2002 | 40    | 1.86 ± 0.12                  | 12.7 ± 2.9                                      | <.0001  | 26.6 ± 5.5 | <.0001  | 0.35           |
| OLF  | 2003 | 53    | 0.83 ± 0.10                  | 17.1 ± 1.7                                      | <.0001  | 25.9 ± 1.9 | <.0001  | 0.67           |
| OLF  | 2004 | 53    | 1.34 ± 0.14                  | 5.7 ± 1.9                                       | 0.0036  | 36.3 ± 3.1 | <.0001  | 0.16           |
| OLF  | 2005 | 42    | 1.25 ± 0.12                  | 13.4 ± 2.2                                      | <.0001  | 27.9 ± 3.2 | <.0001  | 0.48           |
| OLF  | 2006 | 59    | 1.22 ± 0.10                  | 20.6 ± 1.8                                      | <.0001  | 26.6 ± 2.5 | <.0001  | 0.72           |
| OLF  | 2007 | 55    | 1.06 ± 0.09                  | 23.3 ± 1.5                                      | <.0001  | 21.8 ± 1.9 | <.0001  | 0.82           |
| OLF  | 2008 | 58    | 0.91 ± 0.11                  | 17.7 ± 1.2                                      | <.0001  | 26.7 ± 1.5 | <.0001  | 0.78           |
| OLF  | 2009 | 60    | 1.25 ± 0.06                  | 24.3 ± 2.4                                      | <.0001  | 19.7 ± 1.8 | <.0001  | 0.68           |
| OLF  | 2010 | 57    | 0.87 ± 0.07                  | 14.0 ± 2.8                                      | <.0001  | 26.7 ± 2.7 | <.0001  | 0.33           |
| OLF  | 2011 | 57    | 1.13 ± 0.10                  | 12.9 ± 2.1                                      | <.0001  | 27.8 ± 2.9 | <.0001  | 0.40           |
| OLF  | 2012 | 56    | 1.12 ± 0.08                  | 15.6 ± 2.4                                      | <.0001  | 24.5 ± 3.0 | <.0001  | 0.44           |
| OLF  | 2013 | 58    | 0.81 ± 0.05                  | 19.6 ± 2.2                                      | <.0001  | 18.5 ± 2.0 | <.0001  | 0.59           |
| OLF  | 2014 | 51    | 1.15 ± 0.05                  | 13.2 ± 3.5                                      | 0.0004  | 25.1 ± 4.2 | <.0001  | 0.23           |
| PNS  | 2003 | 52    | 0.71 ± 0.09                  | 16.5 ± 2.1                                      | <.0001  | 24.5 ± 2.0 | <.0001  | 0.56           |
| PNS  | 2004 | 52    | 0.88 ± 0.23                  | 5.8 ± 1.1                                       | <.0001  | 38.0 ± 2.3 | <.0001  | 0.46           |
| PNS  | 2005 | 39    | 1.14 ± 0.16                  | 10.9 ± 2.2                                      | <.0001  | 29.0 ± 3.4 | <.0001  | 0.41           |
| PNS  | 2006 | 58    | 0.89 ± 0.14                  | 13.9 ± 1.5                                      | <.0001  | 39.7 ± 2.1 | <.0001  | 0.59           |
| PNS  | 2007 | 49    | 1.09 ± 0.09                  | 23.6 ± 2.4                                      | <.0001  | 20.3 ± 3.0 | <.0001  | 0.67           |
| PNS  | 2008 | 55    | 0.70 ± 0.07                  | 27.0 ± 2.1                                      | <.0001  | 21.3 ± 1.8 | <.0001  | 0.76           |
| PNS  | 2009 | 60    | 1.21 ± 0.10                  | 13.5 ± 1.5                                      | <.0001  | 32.7 ± 2.2 | <.0001  | 0.58           |
| YRK  | 1997 | 57    | 4.54 ± 0.26                  | 4.8 ± 0.8                                       | <.0001  | 37.5 ± 4.0 | <.0001  | 0.39           |
| YRK  | 1998 | 57    | 4.78 ± 0.36                  | 5.9 ± 0.5                                       | <.0001  | 35.9 ± 2.6 | <.0001  | 0.74           |
| YRK  | 2002 | 45    | 4.54 ± 0.48                  | 5.6 ± 0.8                                       | <.0001  | 42.0 ± 4.3 | <.0001  | 0.57           |
| YRK  | 2003 | 32    | 2.24 ± 0.37                  | 7.6 ± 0.6                                       | <.0001  | 36.0 ± 1.9 | <.0001  | 0.83           |
| YRK  | 2004 | 56    | 2.03 ± 0.13                  | 11.5 ± 1.2                                      | <.0001  | 27.4 ± 2.8 | <.0001  | 0.62           |
| YRK  | 2005 | 57    | 2.14 ± 0.19                  | 7.5 ± 1.3                                       | <.0001  | 36.5 ± 3.6 | <.0001  | 0.48           |
| YRK  | 2006 | 45    | 2.47 ± 0.19                  | 9.2 ± 1.0                                       | <.0001  | 38.4 ± 2.7 | <.0001  | 0.67           |
| YRK  | 2007 | 52    | 1.93 ± 0.15                  | 5.9 ± 1.4                                       | <.0001  | 38.2 ± 3.1 | <.0001  | 0.29           |
| YRK  | 2008 | 59    | 1.80 ± 0.10                  | 11.9 ± 1.3                                      | <.0001  | 31.8 ± 2.6 | <.0001  | 0.59           |
| YRK  | 2009 | 56    | 0.97 ± 0.07                  | 18.5 ± 1.5                                      | <.0001  | 31.1 ± 1.7 | <.0001  | 0.73           |
| YRK  | 2010 | 60    | 1.34 ± 0.08                  | 19.9 ± 1.5                                      | <.0001  | 21.8 ± 2.2 | <.0001  | 0.76           |
| YRK  | 2011 | 59    | 1.67 ± 0.10                  | 19.5 ± 1.1                                      | <.0001  | 19.2 ± 2.0 | <.0001  | 0.86           |
| YRK  | 2012 | 49    | 1.96 ± 0.11                  | 15.4 ± 1.5                                      | <.0001  | 23.4 ± 3.2 | <.0001  | 0.68           |
| YRK  | 2013 | 53    | 1.07 ± 0.08                  | 18.8 ± 1.4                                      | <.0001  | 19.5 ± 1.7 | <.0001  | 0.81           |
| YRK  | 2014 | 57    | 1.10 ± 0.06                  | 15.0 ± 2.2                                      | <.0001  | 24.7 ± 2.6 | <.0001  | 0.45           |

Table S5. Comparison of regression results.

| Site | Year | Count | Slope 2<br>pm O <sub>3</sub> vs<br>2 pm NO <sub>z</sub> | P-<br>Value | r <sup>2</sup> | Slope pm -<br>am O <sub>3</sub> vs<br>pm - am<br>NO <sub>z</sub> | P-<br>Value | r <sup>2</sup> | Slope late<br>- mid am<br>O <sub>3</sub> vs late -<br>mid am<br>NO <sub>z</sub> | P-<br>Value | r <sup>2</sup> |
|------|------|-------|---------------------------------------------------------|-------------|----------------|------------------------------------------------------------------|-------------|----------------|---------------------------------------------------------------------------------|-------------|----------------|
| BHM  | 2004 | 29    | 5.9 ± 1.5                                               | 0.0006      | 0.36           | 1.8 ± 1.1                                                        | 0.136       | 0.09           | -0.1 ± 0.7                                                                      | 0.9022      | 0.00           |
| BHM  | 2006 | 43    | 9.1 ± 0.9                                               | <.0001      | 0.69           | 4.3 ± 0.9                                                        | <.0001      | 0.36           | 1.1 ± 1.5                                                                       | 0.4841      | 0.01           |
| BHM  | 2007 | 55    | 9.1 ± 1.1                                               | <.0001      | 0.58           | 5.9 ± 0.8                                                        | <.0001      | 0.52           | 1.8 ± 0.6                                                                       | 0.0029      | 0.15           |
| BHM  | 2008 | 59    | 8.5 ± 1.2                                               | <.0001      | 0.48           | 4.8 ± 0.9                                                        | <.0001      | 0.35           | 2.1 ± 0.7                                                                       | 0.0071      | 0.14           |
| BHM  | 2009 | 56    | 9.7 ± 1.4                                               | <.0001      | 0.49           | 4.1 ± 1.0                                                        | 0.0001      | 0.27           | 1.8 ± 0.8                                                                       | 0.0211      | 0.11           |
| BHM  | 2010 | 56    | 11.6 ± 1.1                                              | <.0001      | 0.67           | 8.6 ± 1.2                                                        | <.0001      | 0.51           | 6.1 ± 0.9                                                                       | <.0001      | 0.51           |
| BHM  | 2011 | 56    | 5.0 ± 1.9                                               | 0.0116      | 0.11           | 3.5 ± 0.8                                                        | <.0001      | 0.29           | 0.9 ± 0.5                                                                       | 0.0843      | 0.06           |
| BHM  | 2012 | 58    | 11.7 ± 1.6                                              | <.0001      | 0.48           | 8.1 ± 1.0                                                        | <.0001      | 0.57           | 4.8 ± 0.6                                                                       | <.0001      | 0.51           |
| BHM  | 2013 | 54    | 13.1 ± 1.2                                              | <.0001      | 0.70           | 3.4 ± 0.8                                                        | <.0001      | 0.28           | 1.2 ± 0.5                                                                       | 0.0173      | 0.10           |
| CTR  | 1997 | 48    | 9.1 ± 1.1                                               | <.0001      | 0.62           | 5.1 ± 0.6                                                        | <.0001      | 0.62           | 5.3 ± 1.0                                                                       | <.0001      | 0.38           |
| CTR  | 1998 | 52    | 11.0 ± 1.8                                              | <.0001      | 0.43           | 3.2 ± 1.0                                                        | 0.0028      | 0.18           | 3.4 ± 0.8                                                                       | <.0001      | 0.28           |
| CTR  | 2002 | 49    | 9.2 ± 1.2                                               | <.0001      | 0.55           | 6.8 ± 1.2                                                        | <.0001      | 0.44           | 3.4 ± 1.3                                                                       | 0.0134      | 0.12           |
| CTR  | 2003 | 55    | 20.2 ± 1.3                                              | <.0001      | 0.82           | 7.5 ± 2.1                                                        | 0.0006      | 0.21           | 4.8 ± 1.8                                                                       | 0.0099      | 0.12           |
| CTR  | 2004 | 42    | 22.0 ± 1.7                                              | <.0001      | 0.80           | 12.0 ± 2.4                                                       | <.0001      | 0.43           | 6.8 ± 2.2                                                                       | 0.003       | 0.18           |
| CTR  | 2005 | 47    | 17.2 ± 1.6                                              | <.0001      | 0.80           | 7.4 ± 2.1                                                        | 0.0016      | 0.30           | 5.3 ± 1.0                                                                       | <.0001      | 0.47           |
| CTR  | 2006 | 58    | 19.8 ± 1.8                                              | <.0001      | 0.69           | 14.1 ± 1.6                                                       | <.0001      | 0.59           | 9.5 ± 2.1                                                                       | <.0001      | 0.27           |
| CTR  | 2007 | 56    | 20.6 ± 2.3                                              | <.0001      | 0.59           | 5.9 ± 2.2                                                        | 0.0086      | 0.12           | 8.2 ± 2.3                                                                       | 0.0007      | 0.20           |
| CTR  | 2008 | 61    | 25.0 ± 1.7                                              | <.0001      | 0.78           | 13.8 ± 1.5                                                       | <.0001      | 0.58           | 11.6 ± 1.7                                                                      | <.0001      | 0.45           |
| CTR  | 2009 | 60    | 21.5 ± 2.8                                              | <.0001      | 0.52           | 13.3 ± 2.2                                                       | <.0001      | 0.39           | 9.2 ± 2.4                                                                       | 0.0003      | 0.21           |
| CTR  | 2010 | 55    | 12.3 ± 2.1                                              | <.0001      | 0.40           | 6.1 ± 1.9                                                        | 0.0018      | 0.18           | 12.6 ± 1.8                                                                      | <.0001      | 0.51           |
| CTR  | 2011 | 59    | 24.3 ± 1.7                                              | <.0001      | 0.79           | 7.4 ± 2.1                                                        | 0.0009      | 0.20           | 8.9 ± 1.9                                                                       | <.0001      | 0.29           |
| CTR  | 2012 | 59    | 25.1 ± 2.0                                              | <.0001      | 0.74           | 13.8 ± 2.0                                                       | <.0001      | 0.47           | 11.0 ± 1.3                                                                      | <.0001      | 0.58           |
| CTR  | 2013 | 59    | 25.7 ± 2.8                                              | <.0001      | 0.61           | 16.4 ± 3.8                                                       | <.0001      | 0.26           | 8.1 ± 2.3                                                                       | 0.0009      | 0.19           |
| CTR  | 2014 | 59    | 24.6 ± 3.6                                              | <.0001      | 0.46           | 3.5 ± 3.2                                                        | 0.2913      | 0.02           | 6.6 ± 3.0                                                                       | 0.031       | 0.08           |
| GFP  | 2006 | 58    | 8.6 ± 2.3                                               | 0.0004      | 0.22           | 0.3 ± 2.1                                                        | 0.8867      | 0.00           | 2.2 ± 1.1                                                                       | 0.0449      | 0.08           |
| GFP  | 2007 | 59    | 7.8 ± 2.1                                               | 0.0004      | 0.24           | 2.2 ± 1.5                                                        | 0.1543      | 0.05           | 1.5 ± 1.3                                                                       | 0.2702      | 0.03           |
| GFP  | 2008 | 49    | 15.2 ± 3.2                                              | <.0001      | 0.71           | 4.5 ± 2.1                                                        | 0.039       | 0.11           | 3.5 ± 1.3                                                                       | 0.0102      | 0.16           |
| GFP  | 2009 | 53    | 21.6 ± 1.9                                              | <.0001      | 0.72           | 5.3 ± 1.6                                                        | 0.0013      | 0.19           | 2.2 ± 1.5                                                                       | 0.1381      | 0.04           |
| GFP  | 2010 | 52    | 15.9 ± 1.7                                              | <.0001      | 0.63           | 10.0 ± 2.1                                                       | <.0001      | 0.32           | 8.0 ± 1.7                                                                       | <.0001      | 0.32           |
| GFP  | 2011 | 60    | 24.3 ± 2.0                                              | <.0001      | 0.72           | 6.5 ± 2.3                                                        | 0.0066      | 0.13           | 7.1 ± 1.6                                                                       | <.0001      | 0.29           |
| JST  | 2001 | 60    | 1.6 ± 0.7                                               | 0.0242      | 0.09           | -0.1 ± 0.4                                                       | 0.7821      | 0.00           | -0.5 ± 0.3                                                                      | 0.1088      | 0.04           |
| JST  | 2002 | 59    | 4.9 ± 0.8                                               | <.0001      | 0.44           | 2.8 ± 0.7                                                        | <.0001      | 0.30           | 0.6 ± 0.7                                                                       | 0.4069      | 0.02           |
| JST  | 2003 | 61    | 6.6 ± 0.6                                               | <.0001      | 0.70           | 2.3 ± 0.6                                                        | 0.0005      | 0.21           | -0.3 ± 0.3                                                                      | 0.3907      | 0.01           |
| JST  | 2004 | 41    | 4.8 ± 0.9                                               | <.0001      | 0.45           | 3.4 ± 0.7                                                        | <.0001      | 0.37           | 0.7 ± 1.0                                                                       | 0.5033      | 0.01           |
| JST  | 2005 | 39    | 4.5 ± 1.0                                               | <.0001      | 0.36           | 2.8 ± 0.9                                                        | 0.0042      | 0.24           | 0.1 ± 0.5                                                                       | 0.8334      | 0.00           |
| JST  | 2006 | 58    | 7.0 ± 0.6                                               | <.0001      | 0.74           | 6.8 ± 0.7                                                        | <.0001      | 0.65           | 2.5 ± 0.8                                                                       | 0.0023      | 0.15           |
| JST  | 2007 | 58    | 8.0 ± 0.7                                               | <.0001      | 0.70           | 5.8 ± 0.8                                                        | <.0001      | 0.52           | 4.4 ± 0.9                                                                       | <.0001      | 0.31           |
| JST  | 2008 | 59    | 9.3 ± 0.6                                               | <.0001      | 0.79           | 6.7 ± 0.7                                                        | <.0001      | 0.65           | 3.2 ± 1.0                                                                       | 0.0013      | 0.17           |
| JST  | 2009 | 57    | 10.3 ± 0.8                                              | <.0001      | 0.75           | 7.7 ± 0.8                                                        | <.0001      | 0.68           | 4.5 ± 1.1                                                                       | 0.0002      | 0.25           |
| JST  | 2010 | 59    | 12.0 ± 1.0                                              | <.0001      | 0.73           | 9.8 ± 0.8                                                        | <.0001      | 0.75           | 7.3 ± 0.8                                                                       | <.0001      | 0.62           |
| JST  | 2011 | 57    | 9.4 ± 0.9                                               | <.0001      | 0.65           | 6.2 ± 1.1                                                        | <.0001      | 0.39           | 3.6 ± 0.9                                                                       | 0.0001      | 0.25           |
| JST  | 2012 | 58    | 14.7 ± 1.3                                              | <.0001      | 0.70           | 6.2 ± 1.4                                                        | <.0001      | 0.26           | 5.0 ± 1.1                                                                       | <.0001      | 0.26           |
| JST  | 2013 | 57    | 14.8 ± 0.9                                              | <.0001      | 0.84           | 10.1 ± 1.2                                                       | <.0001      | 0.59           | 8.7 ± 1.2                                                                       | <.0001      | 0.49           |
| JST  | 2014 | 61    | 13.5 ± 1.1                                              | <.0001      | 0.72           | 10.1 ± 1.4                                                       | <.0001      | 0.47           | 6.0 ± 1.3                                                                       | <.0001      | 0.28           |

| Site | Year | Count | Slope 2<br>pm O <sub>3</sub> vs<br>2 pm NO <sub>z</sub> | P-<br>Value | r <sup>2</sup> | Slope pm -<br>am O <sub>3</sub> vs<br>pm - am<br>NO <sub>z</sub> | P-<br>Value | r <sup>2</sup> | Slope late<br>- mid am<br>O <sub>3</sub> vs late -<br>mid am<br>NO <sub>z</sub> | P-<br>Value | r <sup>2</sup> |
|------|------|-------|---------------------------------------------------------|-------------|----------------|------------------------------------------------------------------|-------------|----------------|---------------------------------------------------------------------------------|-------------|----------------|
| OAK  | 2003 | 50    | 29.0 ± 4.2                                              | <.0001      | 0.44           | 10.7 ± 2.6                                                       | 0.0002      | 0.30           | 3.9 ± 1.3                                                                       | 0.0048      | 0.17           |
| OAK  | 2004 | 51    | 25.4 ± 2.6                                              | <.0001      | 0.69           | 10.2 ± 2.2                                                       | <.0001      | 0.37           | 13.0 ± 2.2                                                                      | <.0001      | 0.47           |
| OAK  | 2005 | 54    | 19.7 ± 2.0                                              | <.0001      | 0.66           | 9.1 ± 1.7                                                        | <.0001      | 0.41           | 9.5 ± 1.5                                                                       | <.0001      | 0.45           |
| OAK  | 2006 | 54    | 11.8 ± 1.8                                              | <.0001      | 0.45           | 8.4 ± 1.7                                                        | <.0001      | 0.32           | 4.4 ± 1.0                                                                       | 0.0001      | 0.25           |
| OAK  | 2007 | 53    | 27.4 ± 3.0                                              | <.0001      | 0.63           | 11.8 ± 2.2                                                       | <.0001      | 0.39           | 10.2 ± 2.0                                                                      | <.0001      | 0.36           |
| OAK  | 2008 | 56    | 35.2 ± 4.8                                              | <.0001      | 0.49           | 15.3 ± 3.8                                                       | 0.0002      | 0.24           | 15.6 ± 2.0                                                                      | <.0001      | 0.56           |
| OAK  | 2009 | 54    | 22.9 ± 3.8                                              | <.0001      | 0.41           | 7.2 ± 2.2                                                        | 0.0023      | 0.18           | 6.1 ± 1.6                                                                       | 0.0004      | 0.23           |
| OAK  | 2010 | 61    | 18.4 ± 2.5                                              | <.0001      | 0.49           | 10.3 ± 2.2                                                       | <.0001      | 0.28           | 2.0 ± 1.6                                                                       | 0.2277      | 0.03           |
| OLF  | 2002 | 40    | 12.7 ± 2.9                                              | <.0001      | 0.35           | 4.9 ± 1.6                                                        | 0.0037      | 0.23           | 2.7 ± 0.8                                                                       | 0.0011      | 0.27           |
| OLF  | 2003 | 53    | 17.1 ± 1.7                                              | <.0001      | 0.67           | 7.8 ± 1.4                                                        | <.0001      | 0.42           | 5.3 ± 0.8                                                                       | <.0001      | 0.49           |
| OLF  | 2004 | 53    | 5.7 ± 1.9                                               | 0.0036      | 0.16           | 1.0 ± 0.7                                                        | 0.1615      | 0.04           | -1.7 ± 0.7                                                                      | 0.0123      | 0.12           |
| OLF  | 2005 | 42    | 13.4 ± 2.2                                              | <.0001      | 0.48           | 1.9 ± 0.9                                                        | 0.0484      | 0.10           | 1.5 ± 0.7                                                                       | 0.036       | 0.10           |
| OLF  | 2006 | 59    | 20.6 ± 1.8                                              | <.0001      | 0.72           | 4.3 ± 1.2                                                        | 0.0006      | 0.22           | 2.3 ± 0.8                                                                       | 0.0079      | 0.14           |
| OLF  | 2007 | 55    | 23.3 ± 1.5                                              | <.0001      | 0.82           | 9.7 ± 1.1                                                        | <.0001      | 0.62           | 7.3 ± 1.0                                                                       | <.0001      | 0.49           |
| OLF  | 2008 | 58    | 17.7 ± 1.2                                              | <.0001      | 0.78           | 6.9 ± 1.3                                                        | <.0001      | 0.35           | 7.3 ± 0.9                                                                       | <.0001      | 0.56           |
| OLF  | 2009 | 60    | 24.3 ± 2.4                                              | <.0001      | 0.68           | 7.9 ± 1.0                                                        | <.0001      | 0.52           | 7.5 ± 1.2                                                                       | <.0001      | 0.41           |
| OLF  | 2010 | 57    | 14.0 ± 2.8                                              | <.0001      | 0.33           | 8.6 ± 1.7                                                        | <.0001      | 0.36           | 12.7 ± 2.1                                                                      | <.0001      | 0.44           |
| OLF  | 2011 | 57    | 12.9 ± 2.1                                              | <.0001      | 0.40           | 4.6 ± 1.4                                                        | 0.0023      | 0.16           | 4.8 ± 1.5                                                                       | 0.0028      | 0.15           |
| OLF  | 2012 | 56    | 15.6 ± 2.4                                              | <.0001      | 0.44           | 4.7 ± 1.8                                                        | 0.0123      | 0.13           | 4.0 ± 1.5                                                                       | 0.0119      | 0.14           |
| OLF  | 2013 | 58    | 19.6 ± 2.2                                              | <.0001      | 0.59           | 11.1 ± 1.8                                                       | <.0001      | 0.44           | 8.2 ± 1.3                                                                       | <.0001      | 0.43           |
| OLF  | 2014 | 51    | 13.2 ± 3.5                                              | 0.0004      | 0.23           | 6.5 ± 1.9                                                        | 0.0015      | 0.20           | 8.5 ± 1.7                                                                       | <.0001      | 0.37           |
| PNS  | 2003 | 52    | 16.5 ± 2.1                                              | <.0001      | 0.56           | 1.4 ± 0.6                                                        | 0.0302      | 0.10           | -0.1 ± 0.4                                                                      | 0.7567      | 0.00           |
| PNS  | 2004 | 52    | 5.8 ± 1.1                                               | <.0001      | 0.46           | 1.8 ± 0.8                                                        | 0.0255      | 0.14           | 0.1 ± 1.0                                                                       | 0.9448      | 0.00           |
| PNS  | 2005 | 39    | 10.9 ± 2.2                                              | <.0001      | 0.41           | 2.8 ± 1.4                                                        | 0.0521      | 0.13           | 2.1 ± 1.4                                                                       | 0.1252      | 0.07           |
| PNS  | 2006 | 58    | 13.9 ± 1.5                                              | <.0001      | 0.59           | 1.6 ± 1.0                                                        | 0.1273      | 0.04           | 1.9 ± 0.9                                                                       | 0.0269      | 0.10           |
| PNS  | 2007 | 49    | 23.6 ± 2.4                                              | <.0001      | 0.67           | 5.4 ± 1.1                                                        | <.0001      | 0.33           | 5.4 ± 0.6                                                                       | <.0001      | 0.67           |
| PNS  | 2008 | 55    | 27.0 ± 2.1                                              | <.0001      | 0.76           | 7.8 ± 1.5                                                        | <.0001      | 0.36           | 3.7 ± 1.4                                                                       | 0.0107      | 0.12           |
| PNS  | 2009 | 60    | 13.5 ± 1.5                                              | <.0001      | 0.58           | 6.5 ± 1.4                                                        | <.0001      | 0.29           | 5.5 ± 0.9                                                                       | <.0001      | 0.42           |
| YRK  | 1997 | 57    | 4.8 ± 0.8                                               | <.0001      | 0.39           | 5.0 ± 0.6                                                        | <.0001      | 0.60           | 3.4 ± 0.7                                                                       | <.0001      | 0.33           |
| YRK  | 1998 | 57    | 5.9 ± 0.5                                               | <.0001      | 0.74           | 5.9 ± 0.6                                                        | <.0001      | 0.67           | 4.3 ± 0.5                                                                       | <.0001      | 0.59           |
| YRK  | 2002 | 45    | 5.6 ± 0.8                                               | <.0001      | 0.57           | 6.5 ± 0.8                                                        | <.0001      | 0.65           | 3.5 ± 1.2                                                                       | 0.0047      | 0.21           |
| YRK  | 2003 | 32    | 7.6 ± 0.6                                               | <.0001      | 0.83           | 6.0 ± 1.1                                                        | <.0001      | 0.59           | 7.3 ± 2.1                                                                       | 0.0027      | 0.37           |
| YRK  | 2004 | 56    | 11.5 ± 1.2                                              | <.0001      | 0.62           | 5.2 ± 1.4                                                        | 0.0007      | 0.22           | 4.7 ± 1.4                                                                       | 0.001       | 0.20           |
| YRK  | 2005 | 57    | 7.5 ± 1.3                                               | <.0001      | 0.48           | 6.4 ± 1.0                                                        | <.0001      | 0.52           | 7.1 ± 1.7                                                                       | 0.0001      | 0.33           |
| YRK  | 2006 | 45    | 9.2 ± 1.0                                               | <.0001      | 0.67           | 8.9 ± 1.2                                                        | <.0001      | 0.58           | 5.3 ± 0.9                                                                       | <.0001      | 0.50           |
| YRK  | 2007 | 52    | 5.9 ± 1.4                                               | <.0001      | 0.29           | 6.1 ± 0.9                                                        | <.0001      | 0.50           | 3.6 ± 0.9                                                                       | 0.0003      | 0.23           |
| YRK  | 2008 | 59    | 11.9 ± 1.3                                              | <.0001      | 0.59           | 7.7 ± 1.3                                                        | <.0001      | 0.38           | 4.5 ± 1.0                                                                       | <.0001      | 0.25           |
| YRK  | 2009 | 56    | 18.5 ± 1.5                                              | <.0001      | 0.73           | 11.1 ± 1.4                                                       | <.0001      | 0.56           | 5.7 ± 1.4                                                                       | <.0001      | 0.24           |
| YRK  | 2010 | 60    | 19.9 ± 1.5                                              | <.0001      | 0.76           | 12.6 ± 1.3                                                       | <.0001      | 0.61           | 8.3 ± 1.6                                                                       | <.0001      | 0.33           |
| YRK  | 2011 | 59    | 19.5 ± 1.1                                              | <.0001      | 0.86           | 9.5 ± 1.7                                                        | <.0001      | 0.37           | 7.0 ± 1.4                                                                       | <.0001      | 0.33           |
| YRK  | 2012 | 49    | 15.4 ± 1.5                                              | <.0001      | 0.68           | 10.5 ± 1.2                                                       | <.0001      | 0.64           | 5.2 ± 1.9                                                                       | 0.0085      | 0.14           |
| YRK  | 2013 | 53    | 18.8 ± 1.4                                              | <.0001      | 0.81           | 9.7 ± 2.4                                                        | 0.0003      | 0.28           | 10.4 ± 2.1                                                                      | <.0001      | 0.37           |
| YRK  | 2014 | 57    | 15.0 ± 2.2                                              | <.0001      | 0.45           | 9.6 ± 1.8                                                        | <.0001      | 0.35           | 9.3 ± 1.7                                                                       | <.0001      | 0.39           |



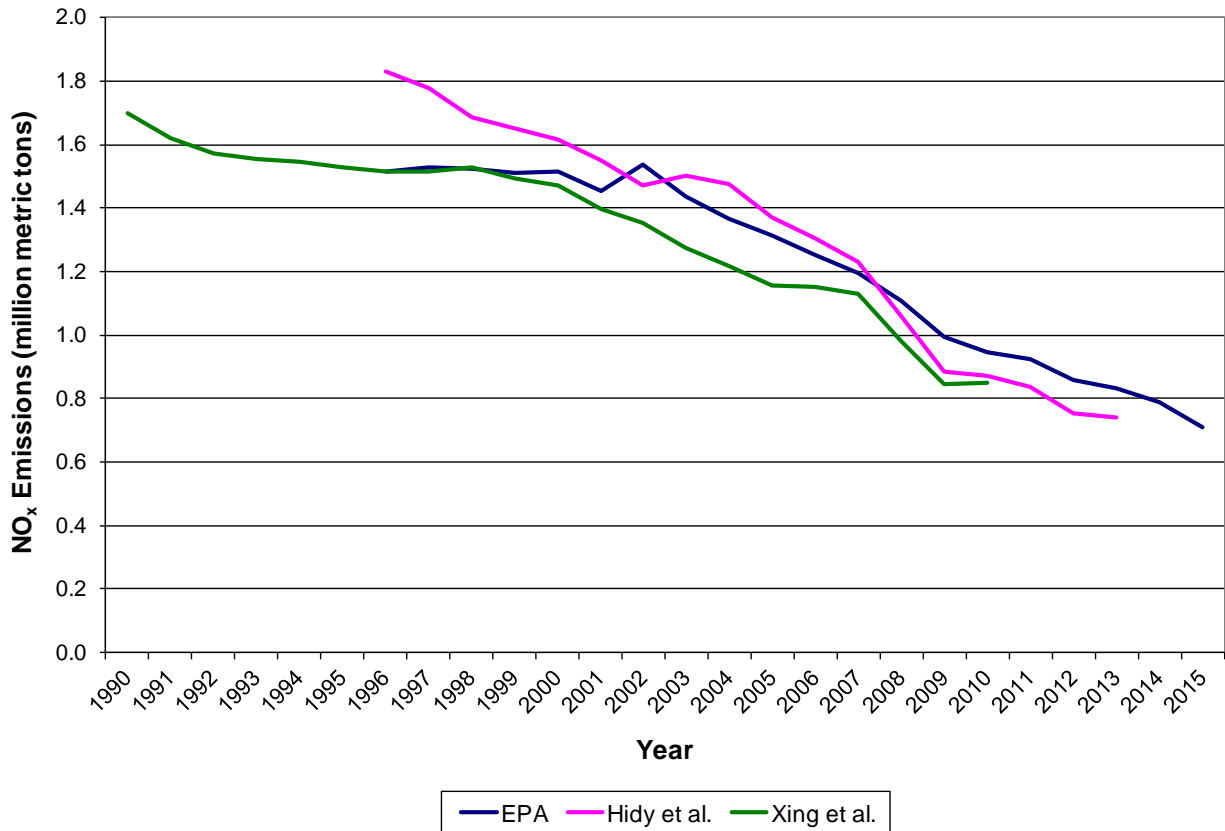

**Figure S1.** Total (all source sectors) annual anthropogenic NO<sub>x</sub> emissions in Georgia, Alabama, and Mississippi obtained from U.S. EPA (2016c; 2016d), Xing et al. (2013), and Hidy et al. (2014). Continuous emission monitoring system (CEMS) data are stack measurements of SO<sub>2</sub>, NO<sub>x</sub>, and CO<sub>2</sub> made daily at facility and unit level at EGUs and other large emission sources. These measurements are actual emissions and have been incorporated into EPA’s National Emission Inventory (NEI) since 1999. Other types of emission estimates are obtained through application of emission models. EPA estimated on-road mobile-source emissions using the EPA MOBILE6 model through the first version of the 2008 NEI. Beginning with version 2 of the 2008 NEI, EPA estimated on-road mobile-source emissions using the MOVES model. EPA recently backcast emissions to 2002 using MOVES to provide improved consistency in its emission trend inventory (U.S. EPA, 2016d). Therefore, the EPA trends inventory is not identical with the 2002 and 2005 NEIs. MOBILE6 and MOVES generate different emission estimates. Hidy et al. (2014) utilized the MOVES model to generate emission factors per unit energy and scaled them by on-road fuel sales. EPA also published a state-level historical emission inventory using consistent methods for all years, disaggregated by major source types, for the years 1990 to 2010, utilizing emission factors from the 2005 and 2008 NEIs (Xing et al., 2013).

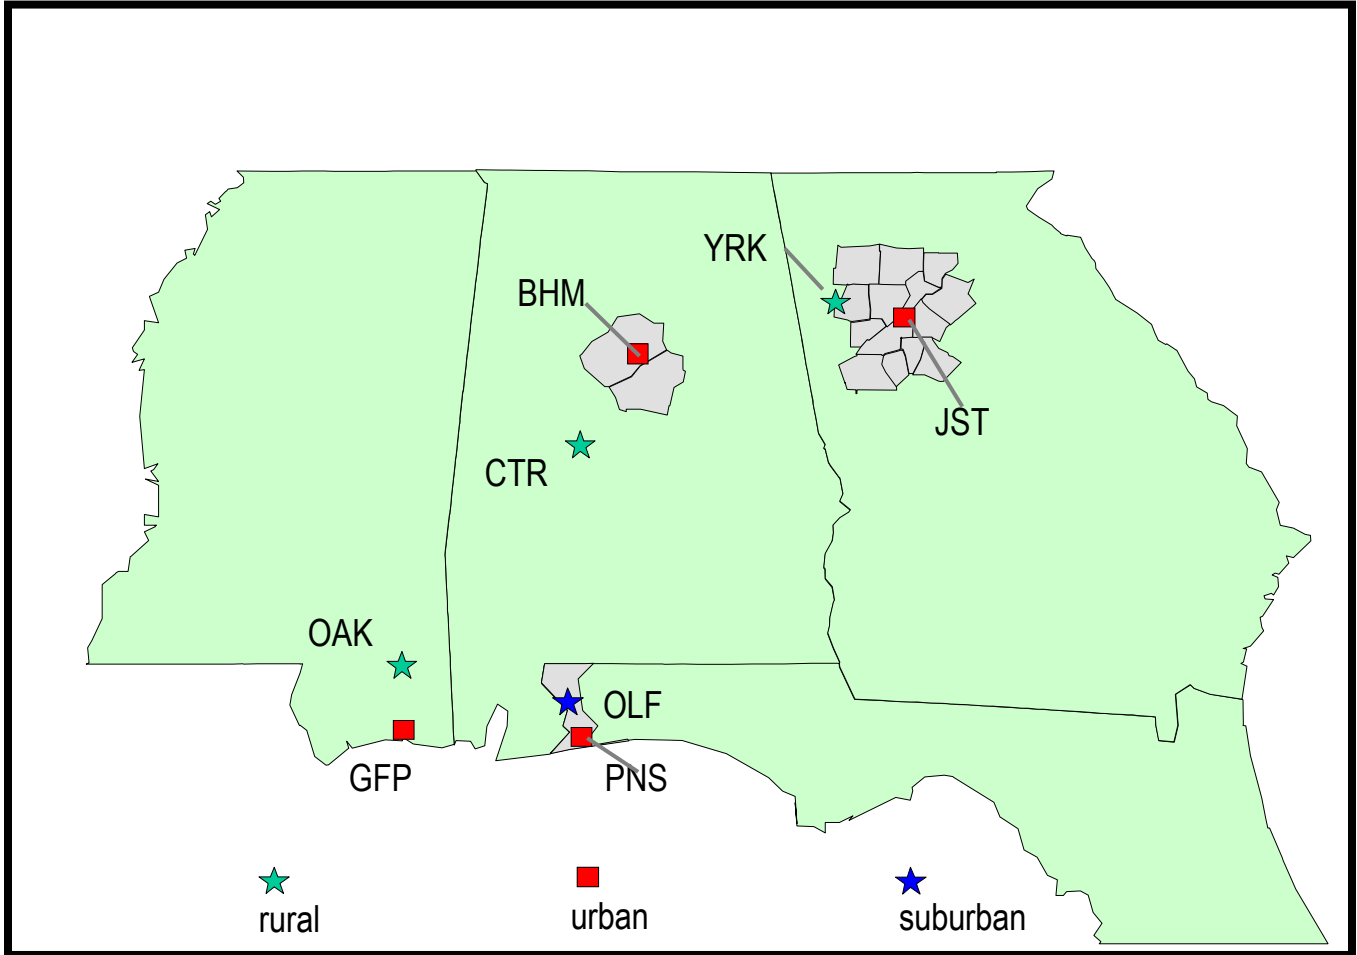

**Figure S2.** SEARCH site location map. PNS, OAK, and GFP were retired at the end of 2009, 2010, and 2012, respectively. Other sites were decommissioned during 2015. The grey shading denotes counties corresponding to the urban metropolitan areas of Birmingham, AL, Atlanta, GA, and Pensacola, FL.

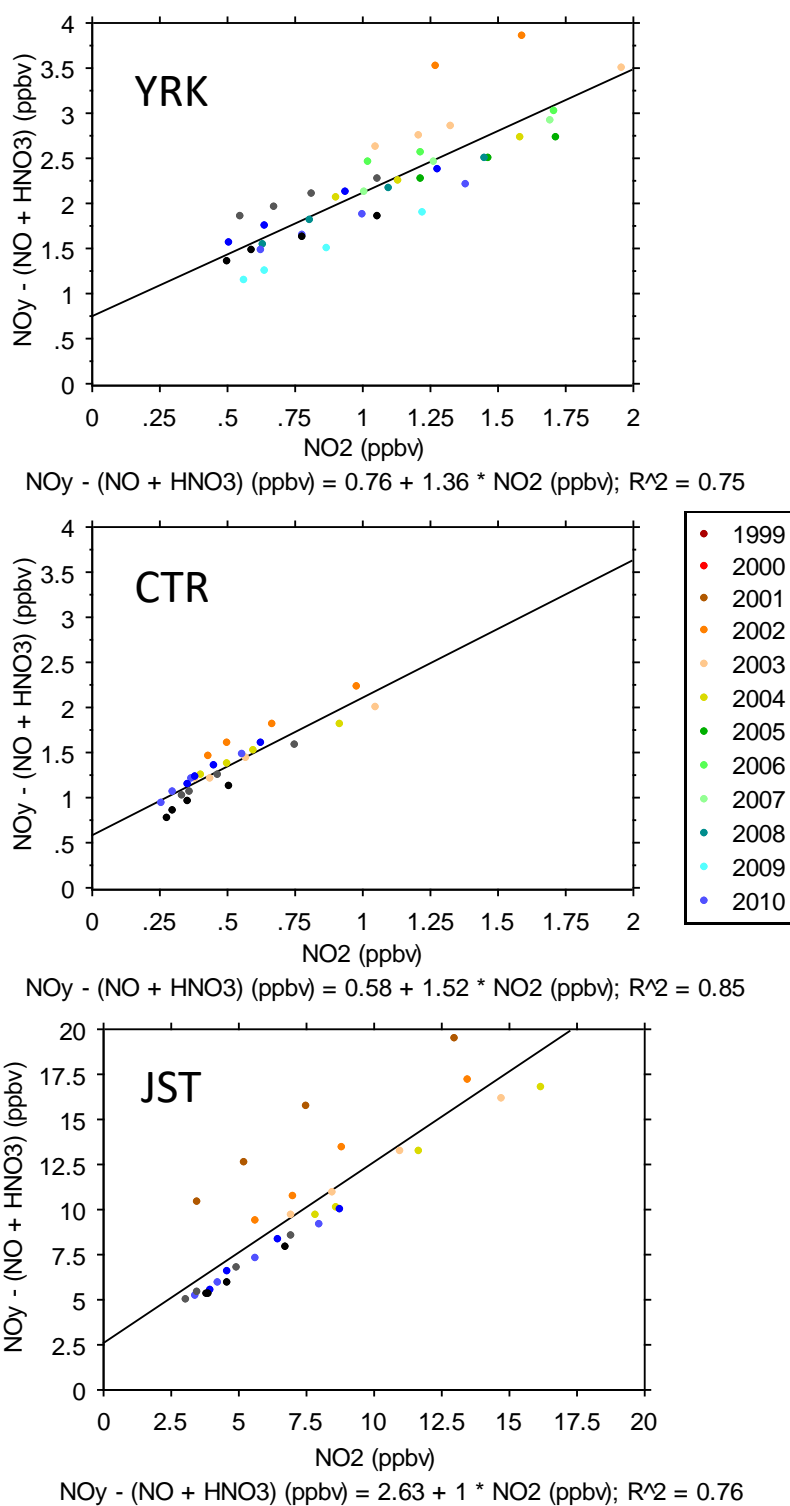

**Figure S3.** Mean NO<sub>y</sub> minus the sum of NO plus HNO<sub>3</sub> vs NO<sub>2</sub>. Means are computed by year and hour for starting hours of 9 a.m. through 12 noon, yielding four hourly averages per year. The data are from June through August. The quantity NO<sub>y</sub> minus the sum of NO plus HNO<sub>3</sub> approximates the sum of NO<sub>2</sub> plus PAN plus other alkyl nitrates. Although different types of NO<sub>2</sub> measurement instruments were deployed, the comparison to NO<sub>y</sub> minus the sum of NO plus HNO<sub>3</sub> is consistent over time, but with larger deviations occurring in 2001 and 2002.

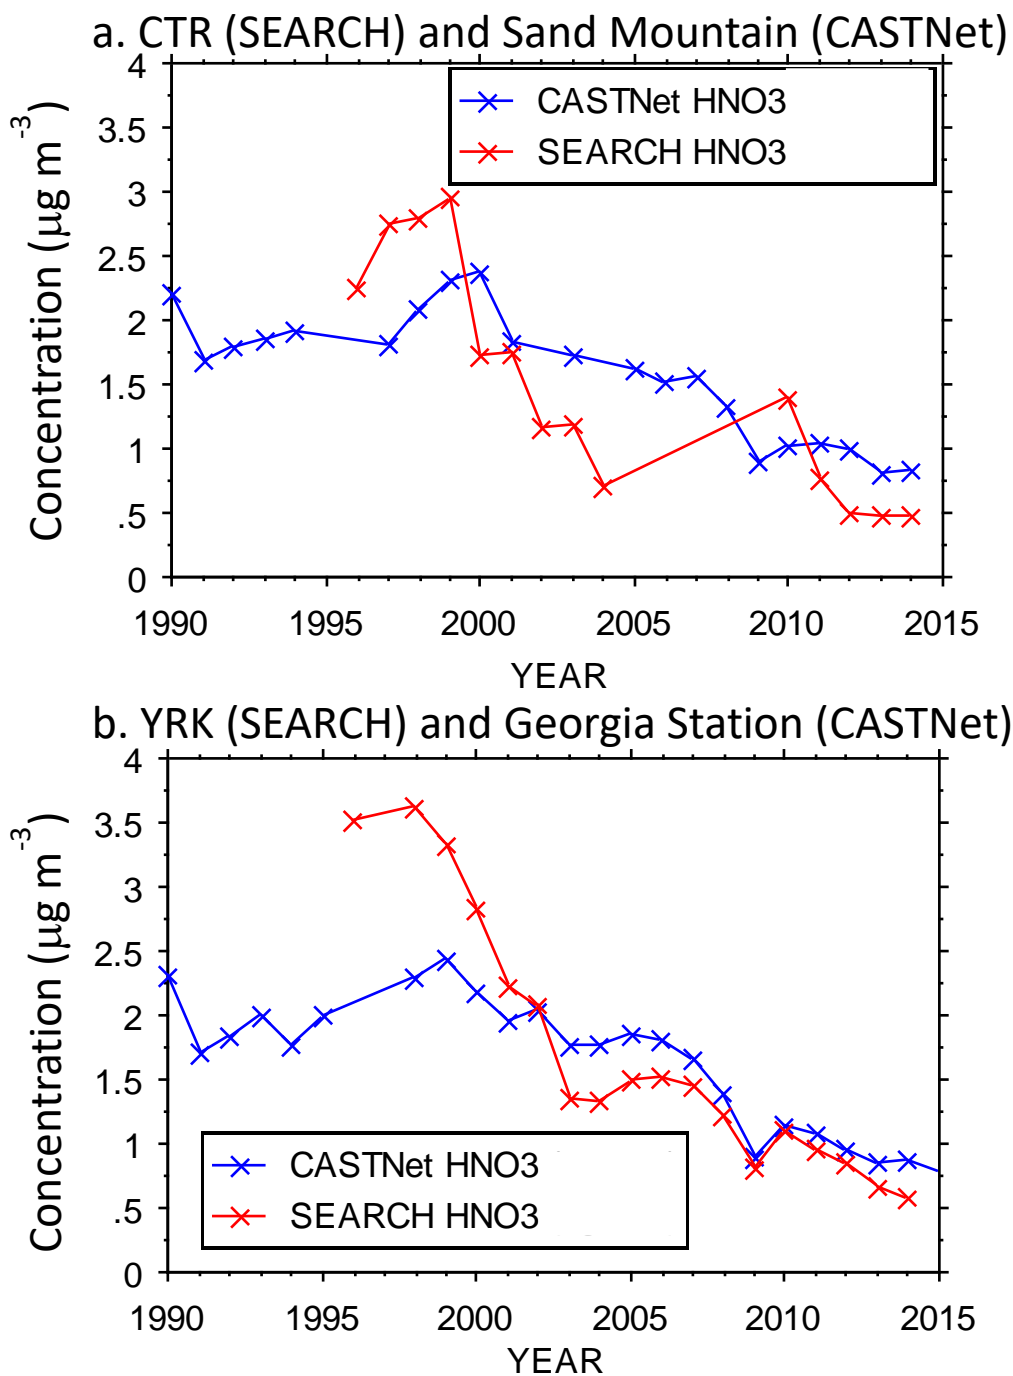

**Figure S4.** Mean annual HNO<sub>3</sub> concentrations at SEARCH and CASTNet sites. SEARCH measurements are hourly denuder-difference mixing ratios (Table S1b) converted to units of concentration. CastNet concentrations are weekly filter-pack measurements.

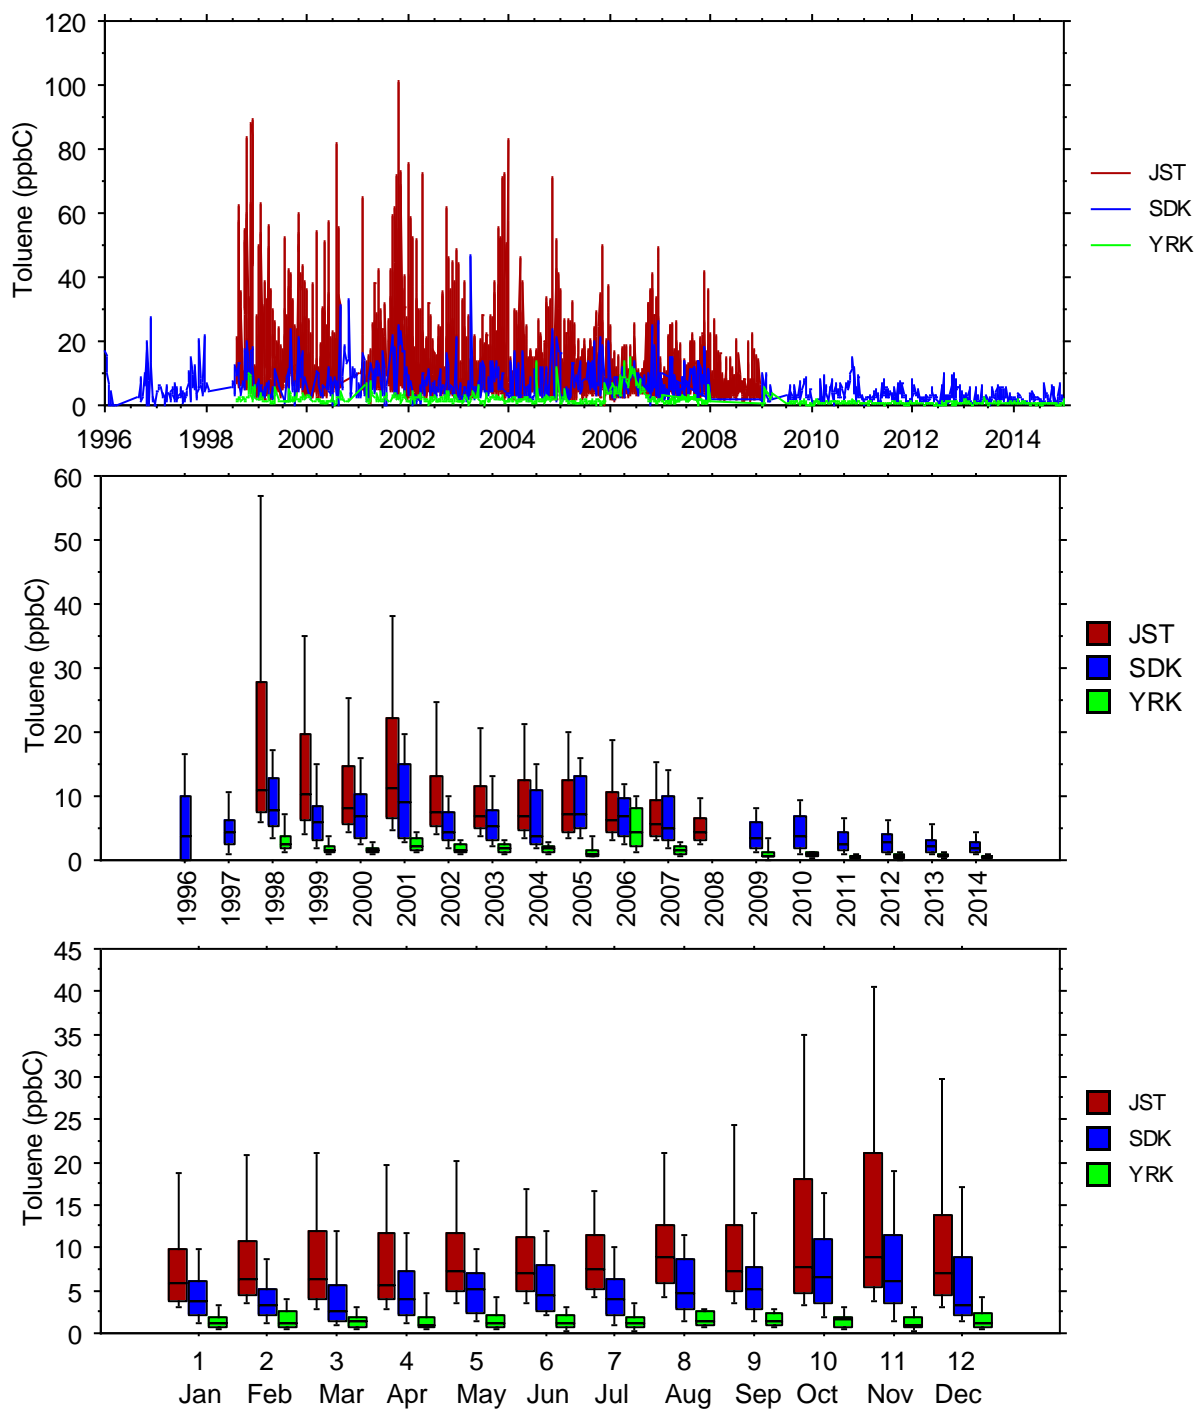

**Figure S5.** (a) Time series of daily-average toluene mixing ratios, (b) statistical distributions of daily-average toluene mixing ratios vs. year, and (c) statistical distributions of daily-average toluene mixing ratios vs. month. Samples were obtained every day at JST and once every six days at YRK and SDK (Blanchard et al., 2010). Statistical distributions indicate the 10<sup>th</sup>, 25<sup>th</sup>, 50<sup>th</sup>, 75<sup>th</sup>, and 90<sup>th</sup> percentiles.

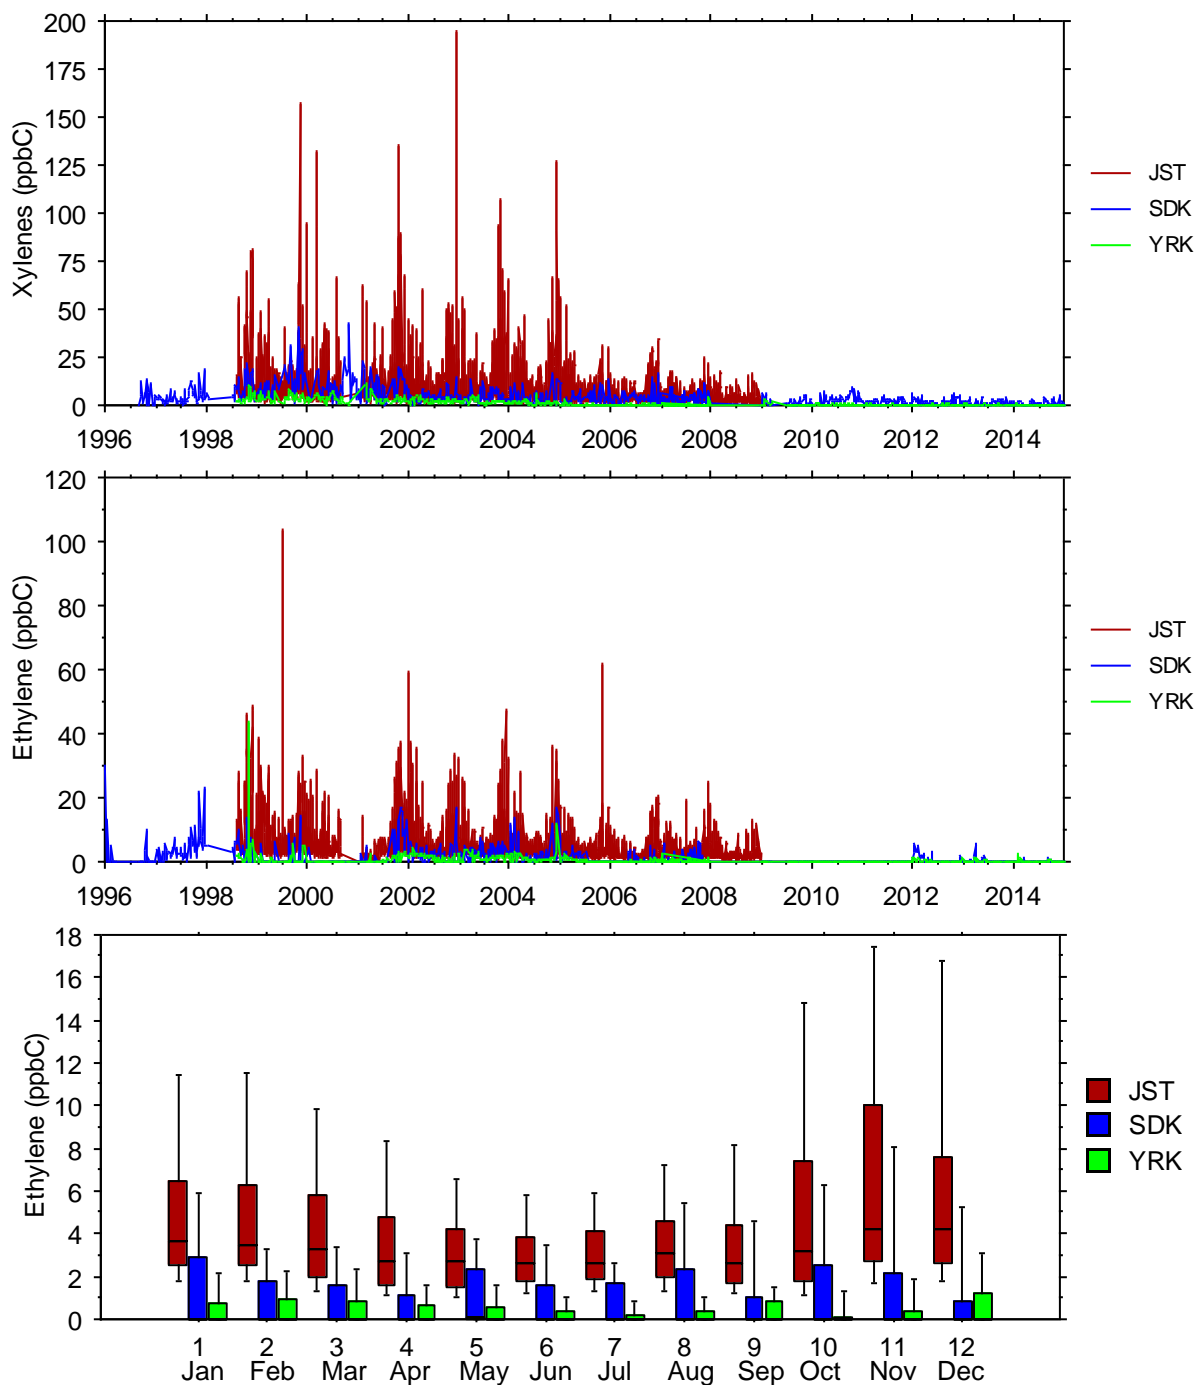

**Figure S6** (a) Time series of daily-average mixing ratios of xylenes, (b) daily-average ethylene mixing ratios vs. year, and (c) statistical distributions of daily-average ethylene mixing ratios vs. month. Samples were obtained every day at JST and once every six days at YRK and SDK (Blanchard et al., 2010). Statistical distributions indicate the 10<sup>th</sup>, 25<sup>th</sup>, 50<sup>th</sup>, 75<sup>th</sup>, and 90<sup>th</sup> percentiles.

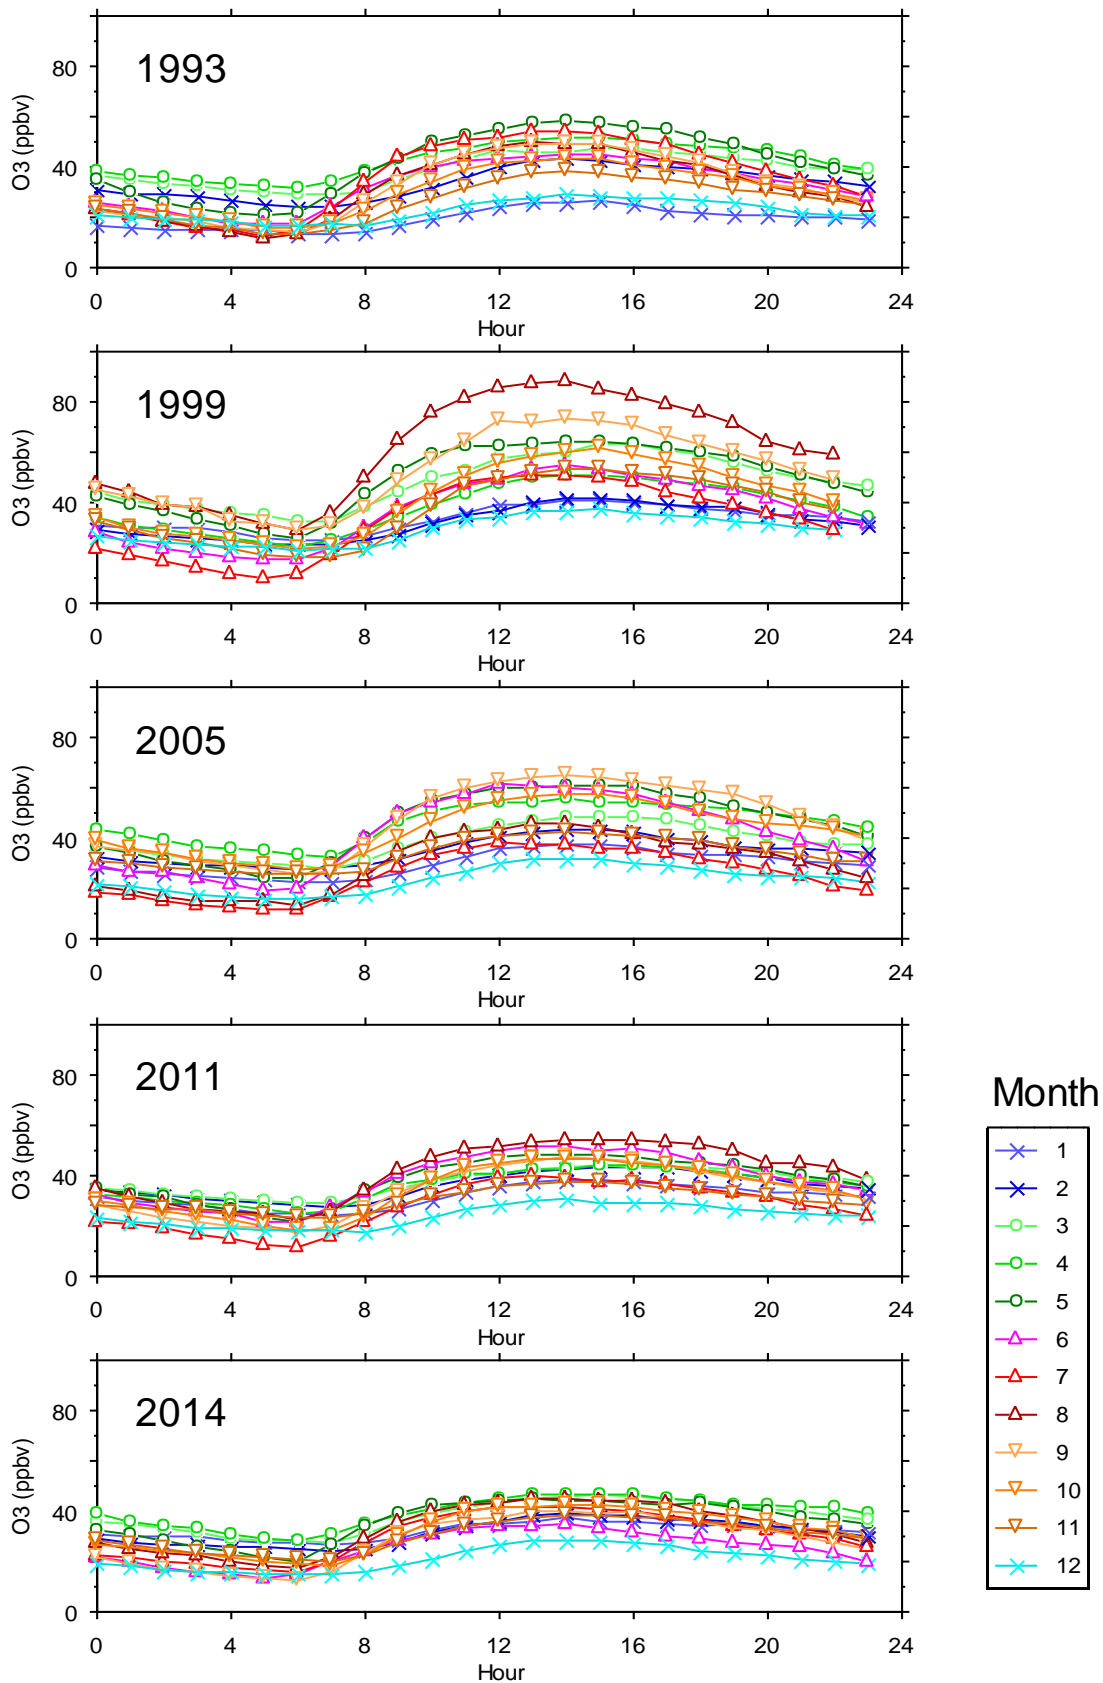

**Figure S7.** Average O<sub>3</sub> mixing ratios at CTR vs. hour, by year and month. Each data point is the mean of all hourly measurements made during each month.

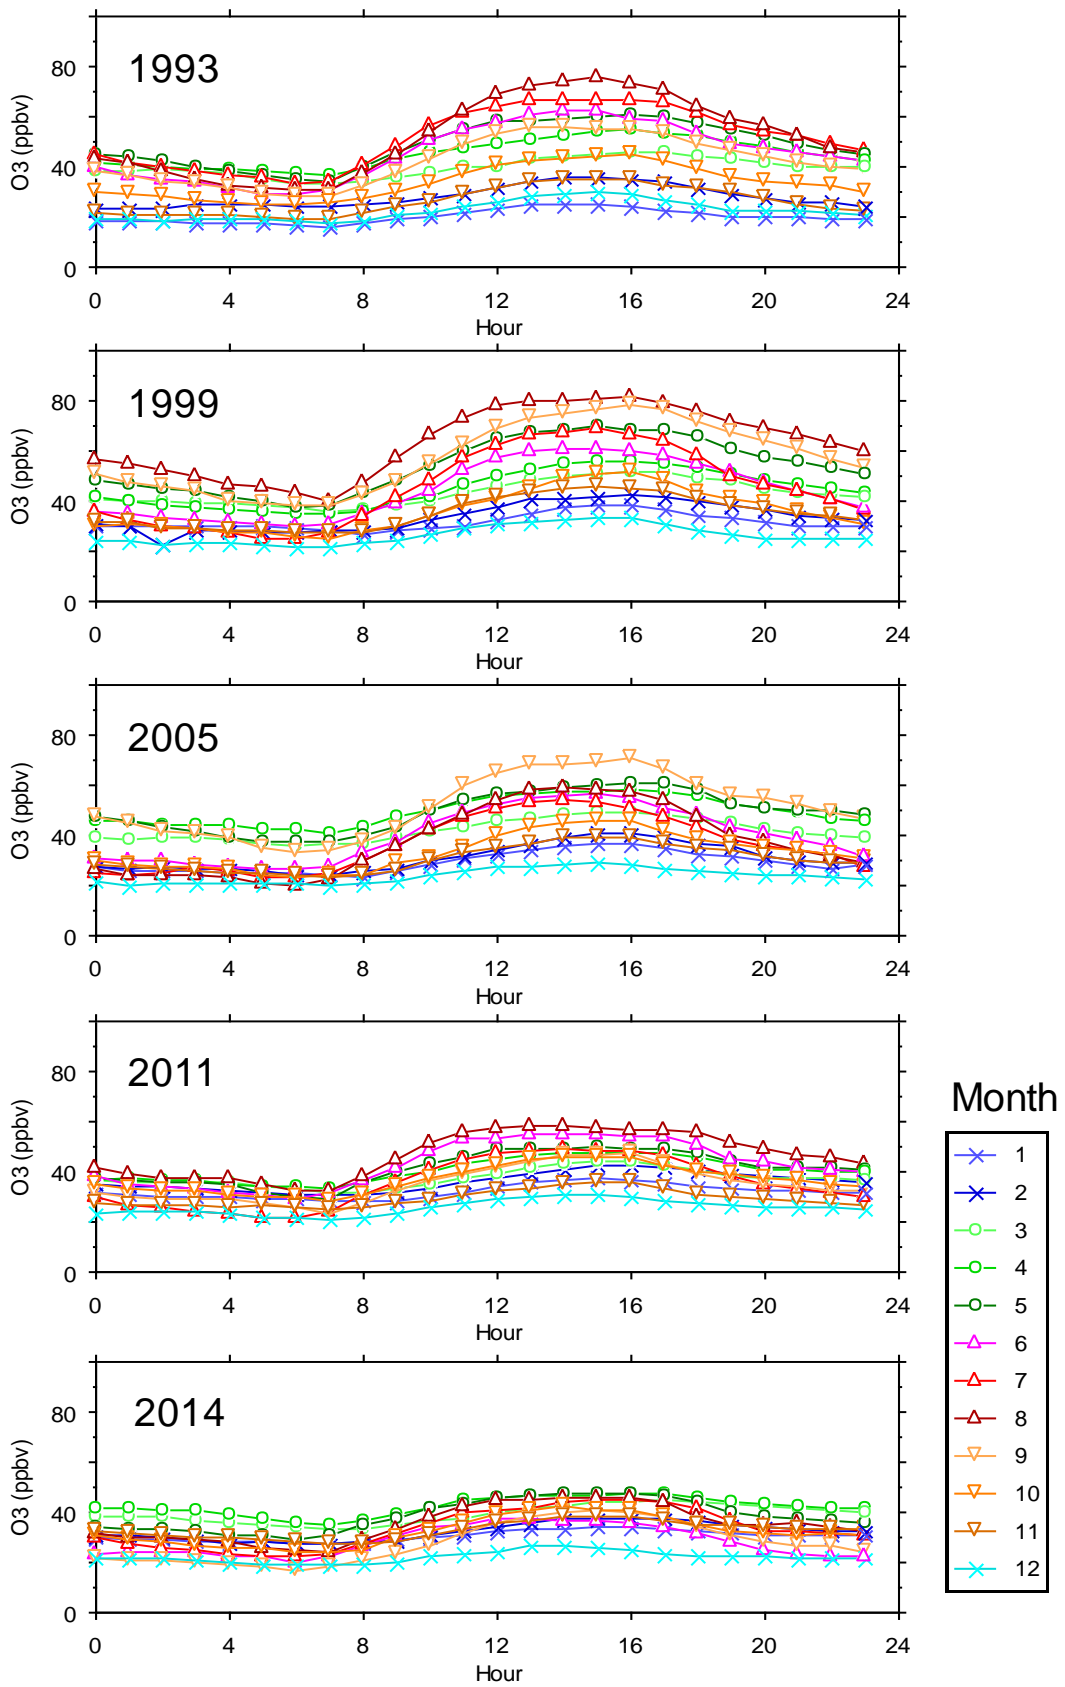

**Figure S8.** Average O<sub>3</sub> mixing ratios at YRK vs. hour, by year and month. Each data point is the mean of all hourly measurements made during each month.



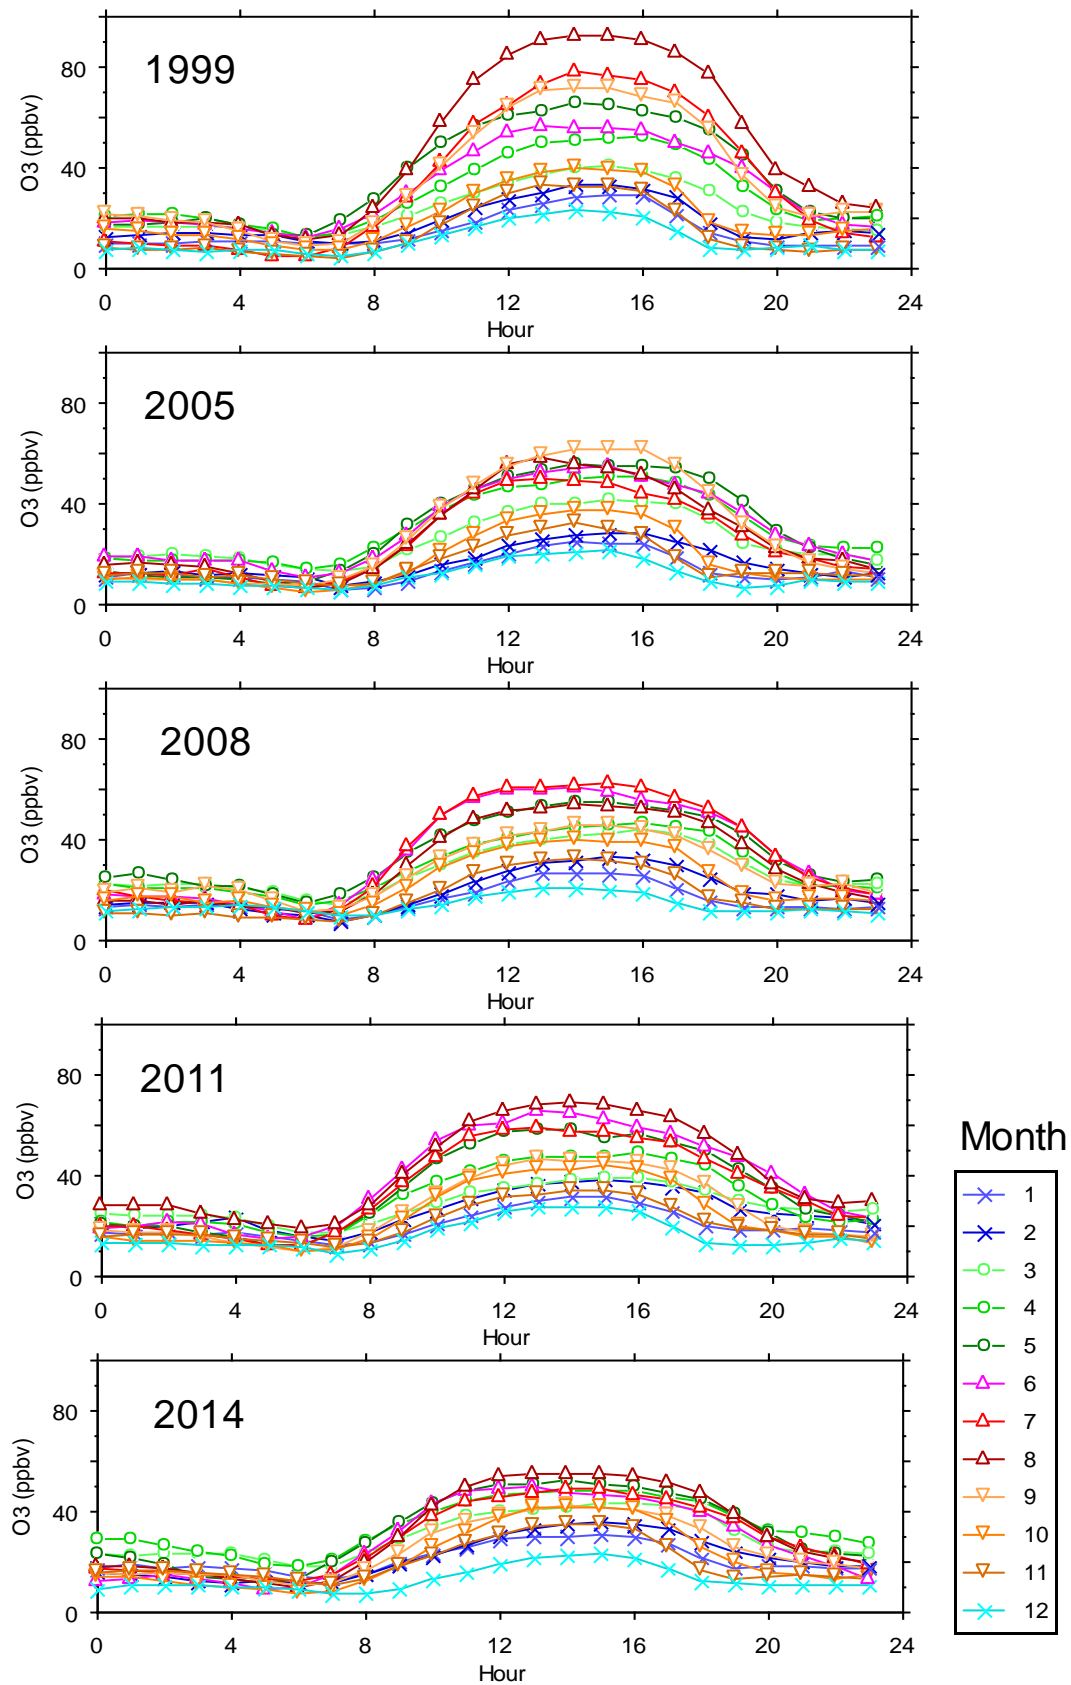

**Figure S9.** Average O<sub>3</sub> mixing ratios at JST vs. hour, by year and month. Each data point is the mean of all hourly measurements made during each month.

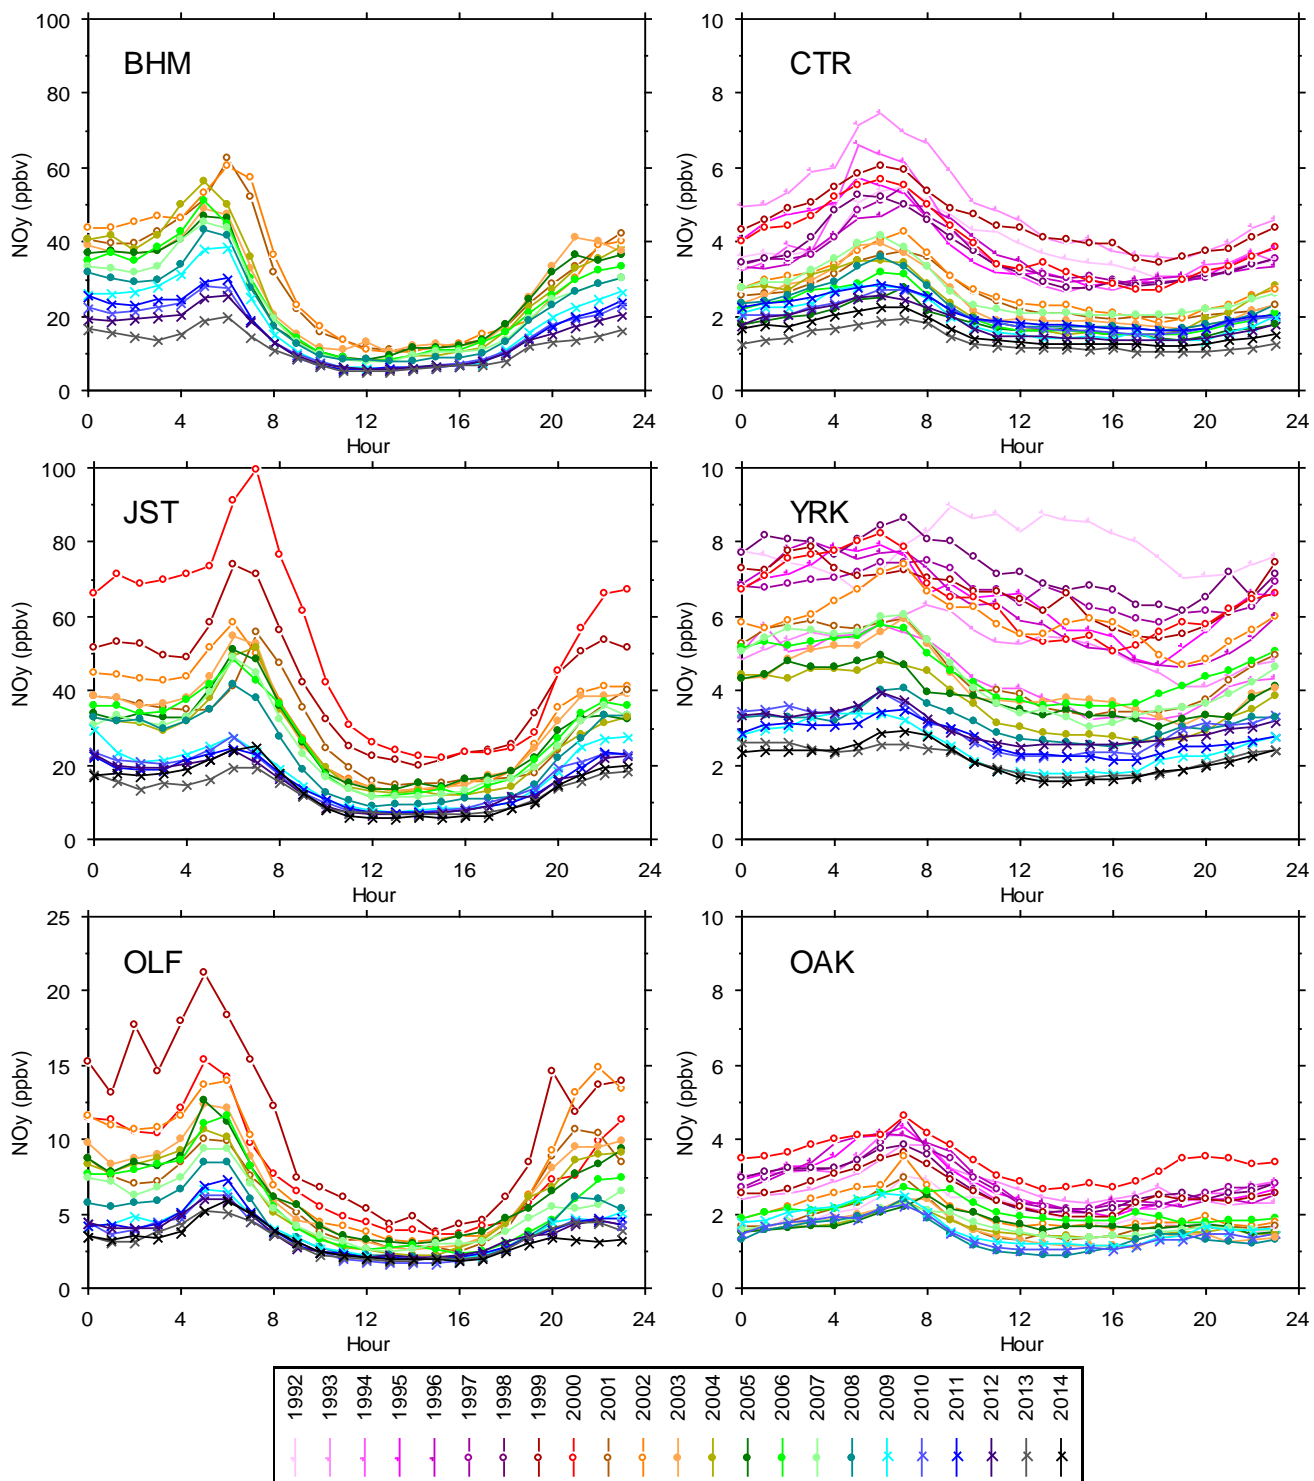

**Figure S10.** Average NO<sub>y</sub> mixing ratios vs. hour, by year. Each data point is the mean of hourly measurements during June through August. PNS and GFP (not shown) exhibit similar diurnal profiles and trends (sampling at those sites ended after 2009 and 2012, respectively). Standard errors of the means are 0.04 – 9 ppbv, approximately proportional (~8%) to NO<sub>y</sub> mixing ratios.

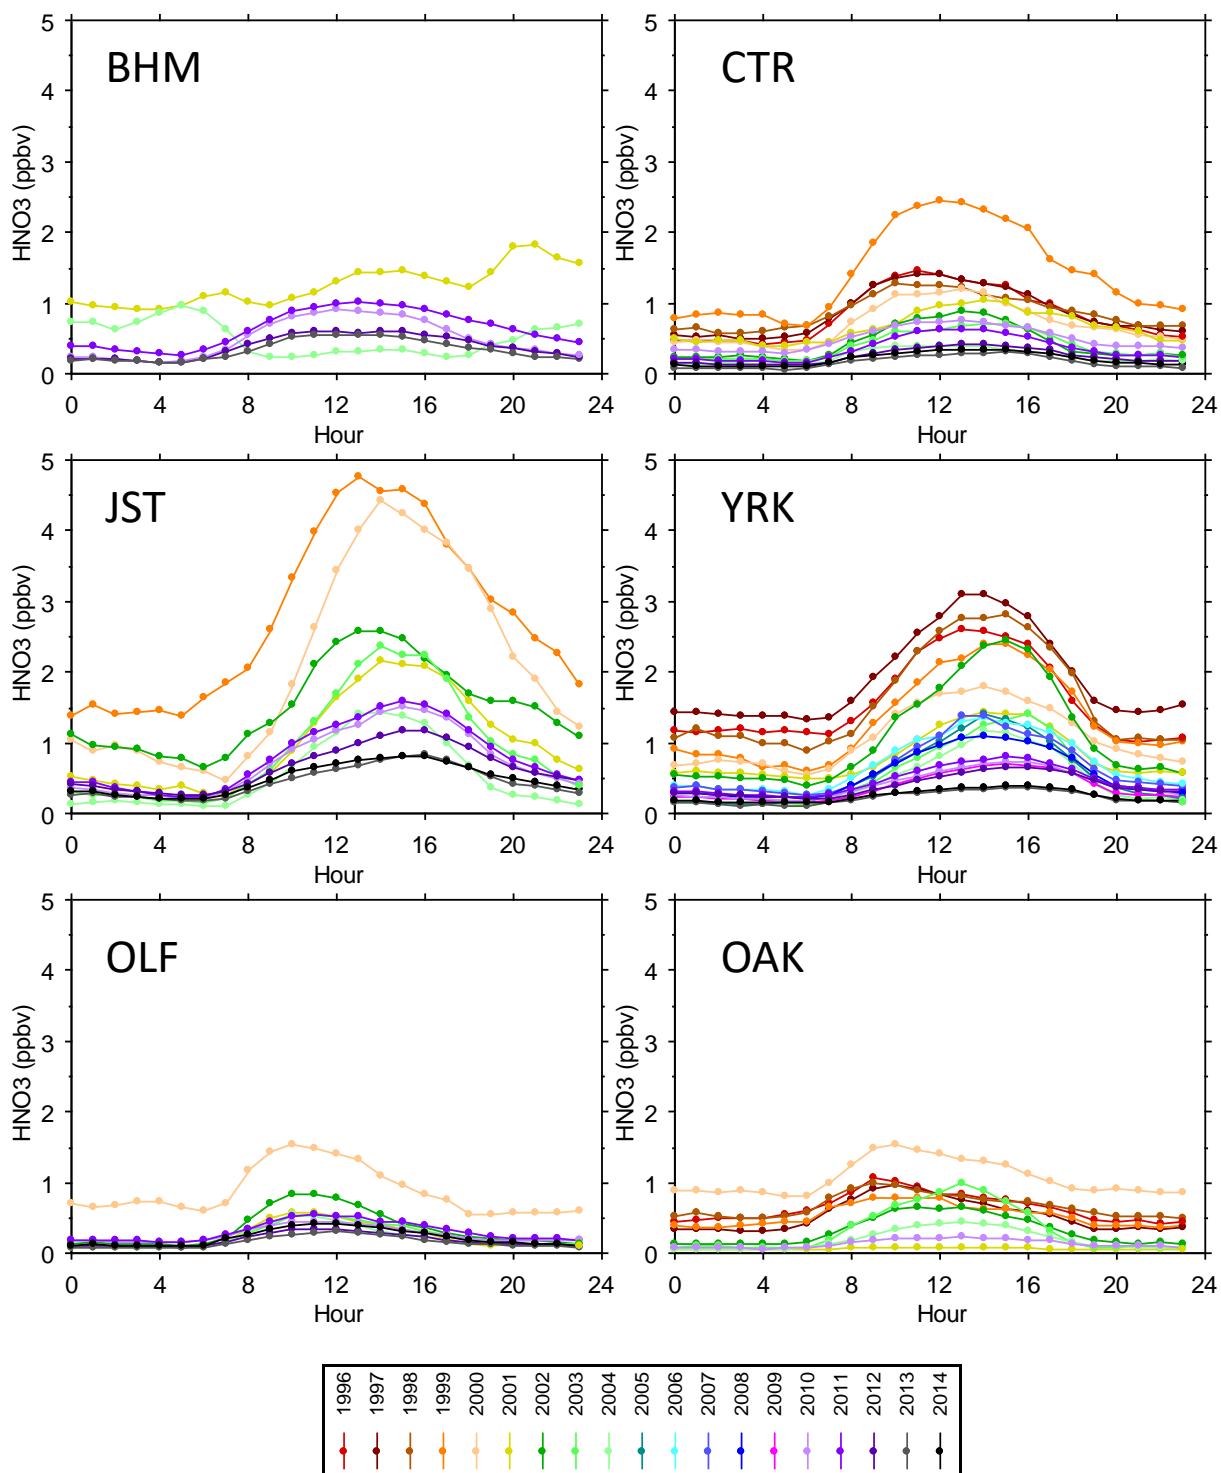

**Figure S11.** Average HNO<sub>3</sub> mixing ratios vs. hour, by year. Each data point is the mean of hourly measurements during June through August. PNS and OAK (not shown) exhibit similar diurnal profiles and trends (sampling at those sites ended after 2009 and 2010, respectively). Standard errors of the means are 0.01 – 1.4 ppbv, approximately proportional (8%) to HNO<sub>3</sub> mixing ratios.

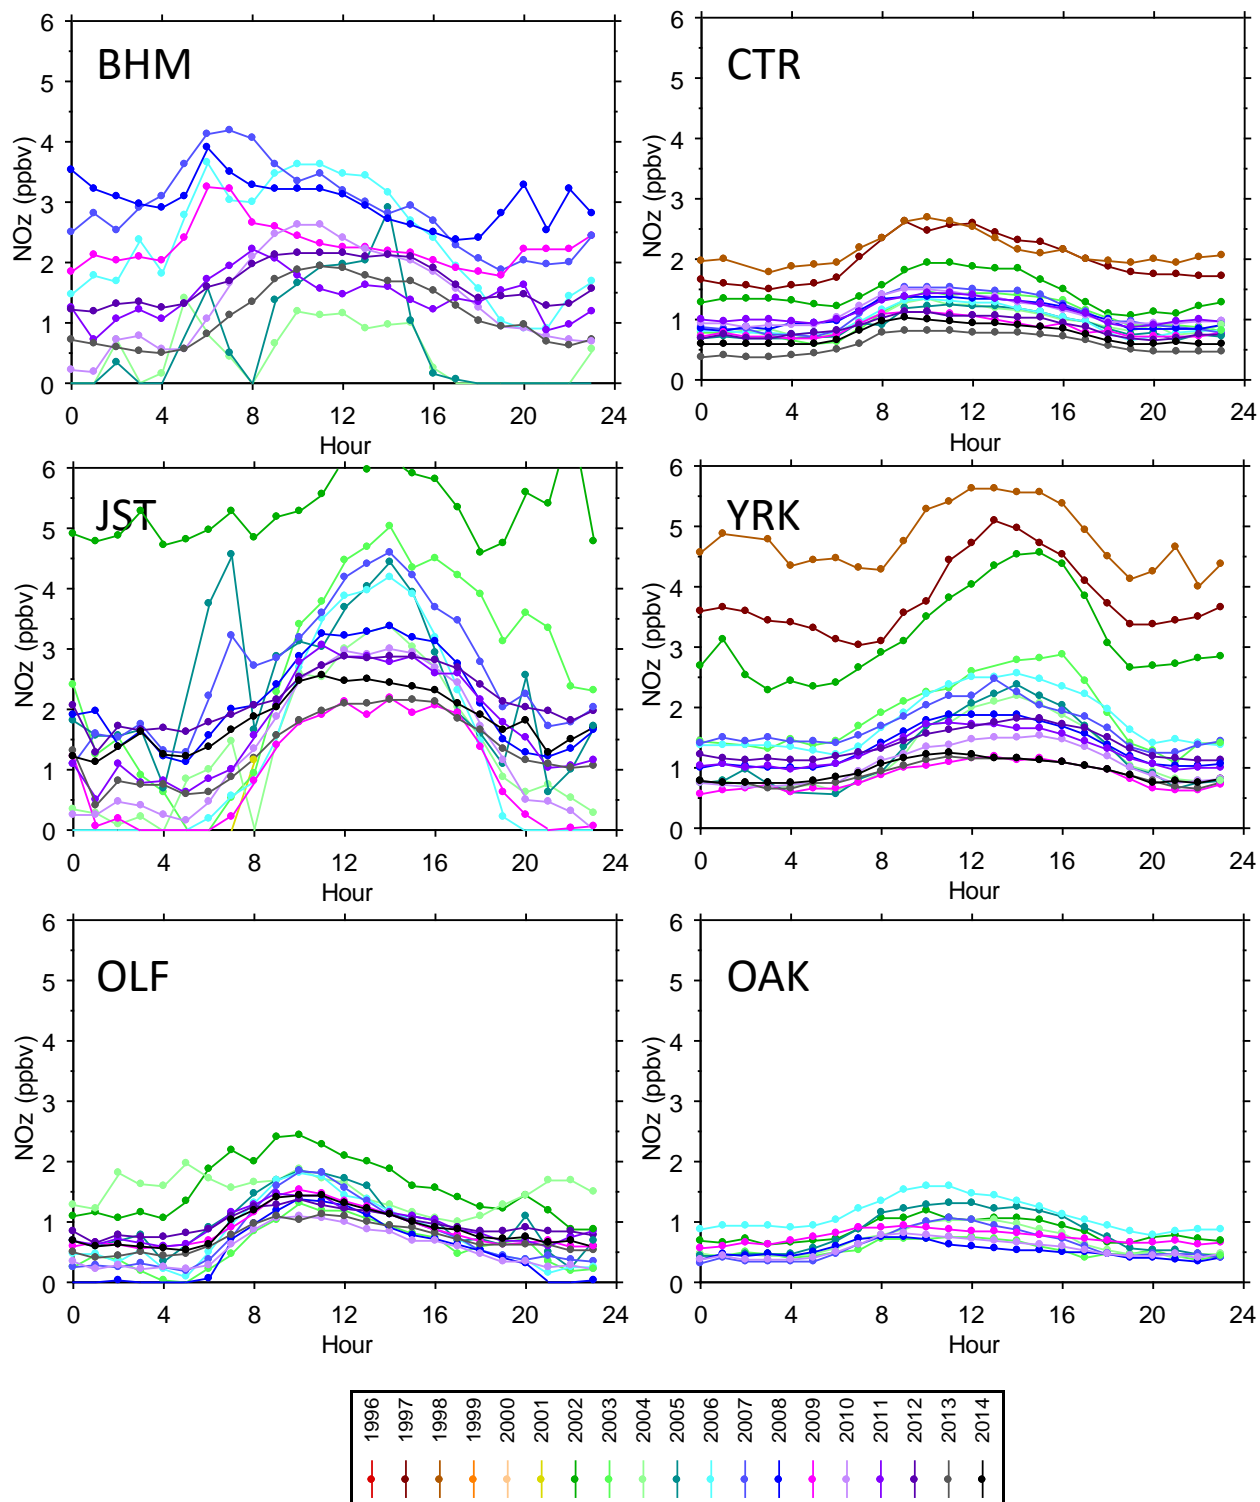

**Figure S12.** Average NO<sub>z</sub> mixing ratios vs. hour, by year. Each data point is the mean of hourly measurements during June through August. PNS and GFP (not shown) exhibit similar diurnal profiles and trends (sampling at those sites ended after 2009 and 2012, respectively). Standard errors of the means are 0.05 – 1.5 ppbv (average 0.3 ppbv); measurement uncertainties for the averages are 0.03 – 0.8 ppbv (average 0.2 ppbv).

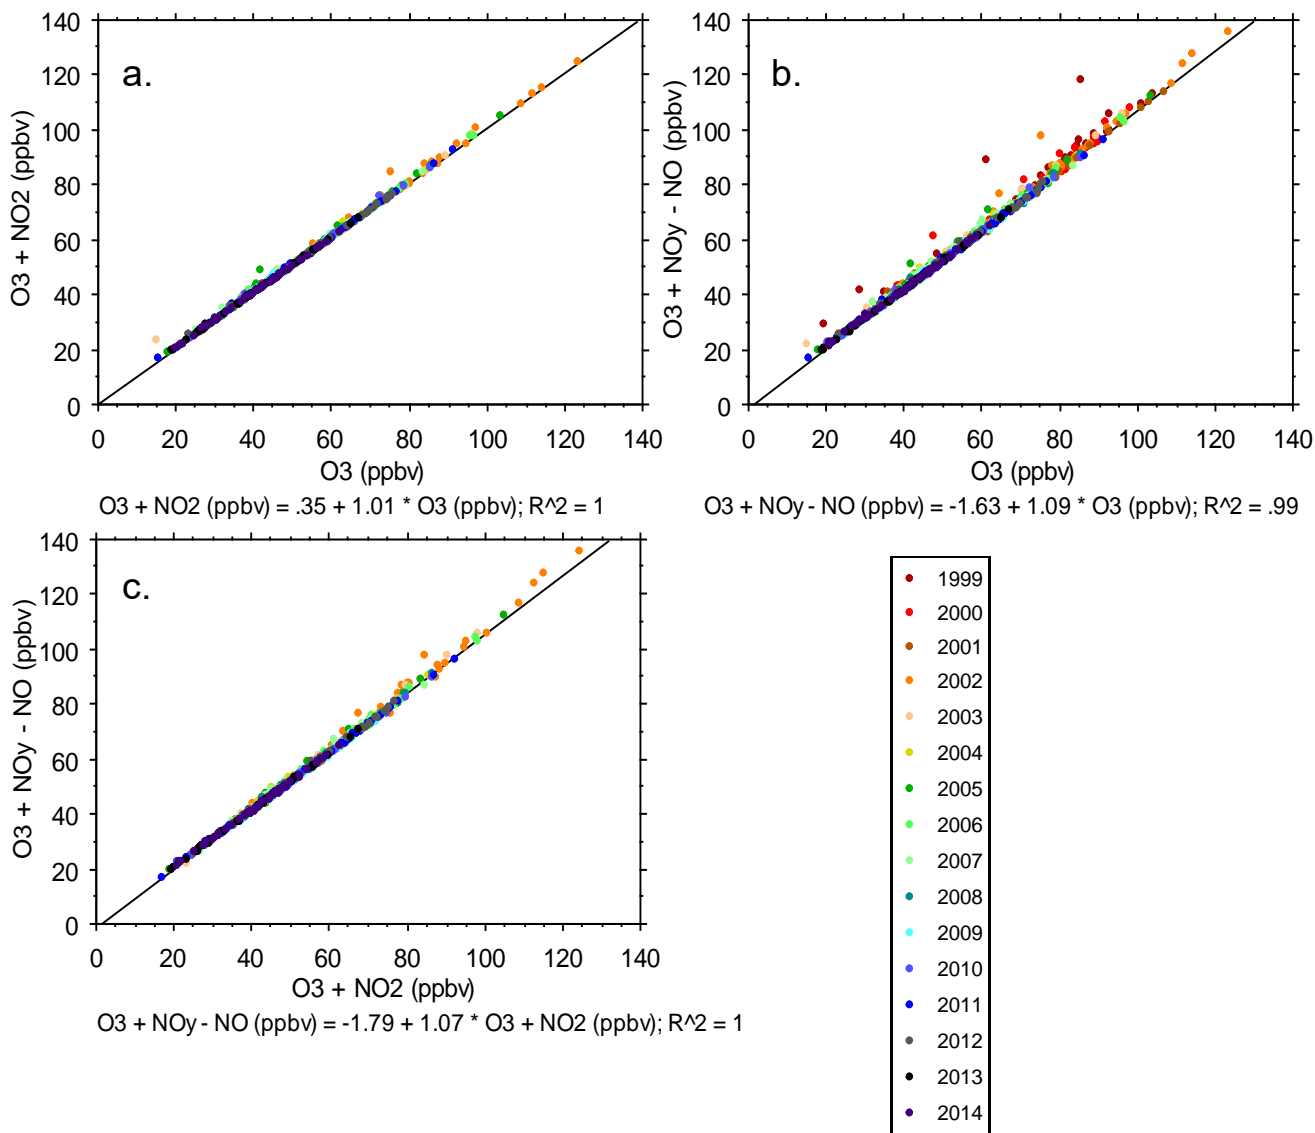

**Figure S13.** YRK 2 p.m. (a)  $O_3 + NO_2$  vs  $O_3$ , (b)  $O_3 + NO_y - NO$  vs  $O_3$ , and (c)  $O_3 + NO_y - NO$  vs.  $O_3 + NO_2$ . Measurements are 2 – 3 p.m. hourly data from June and July of each year.

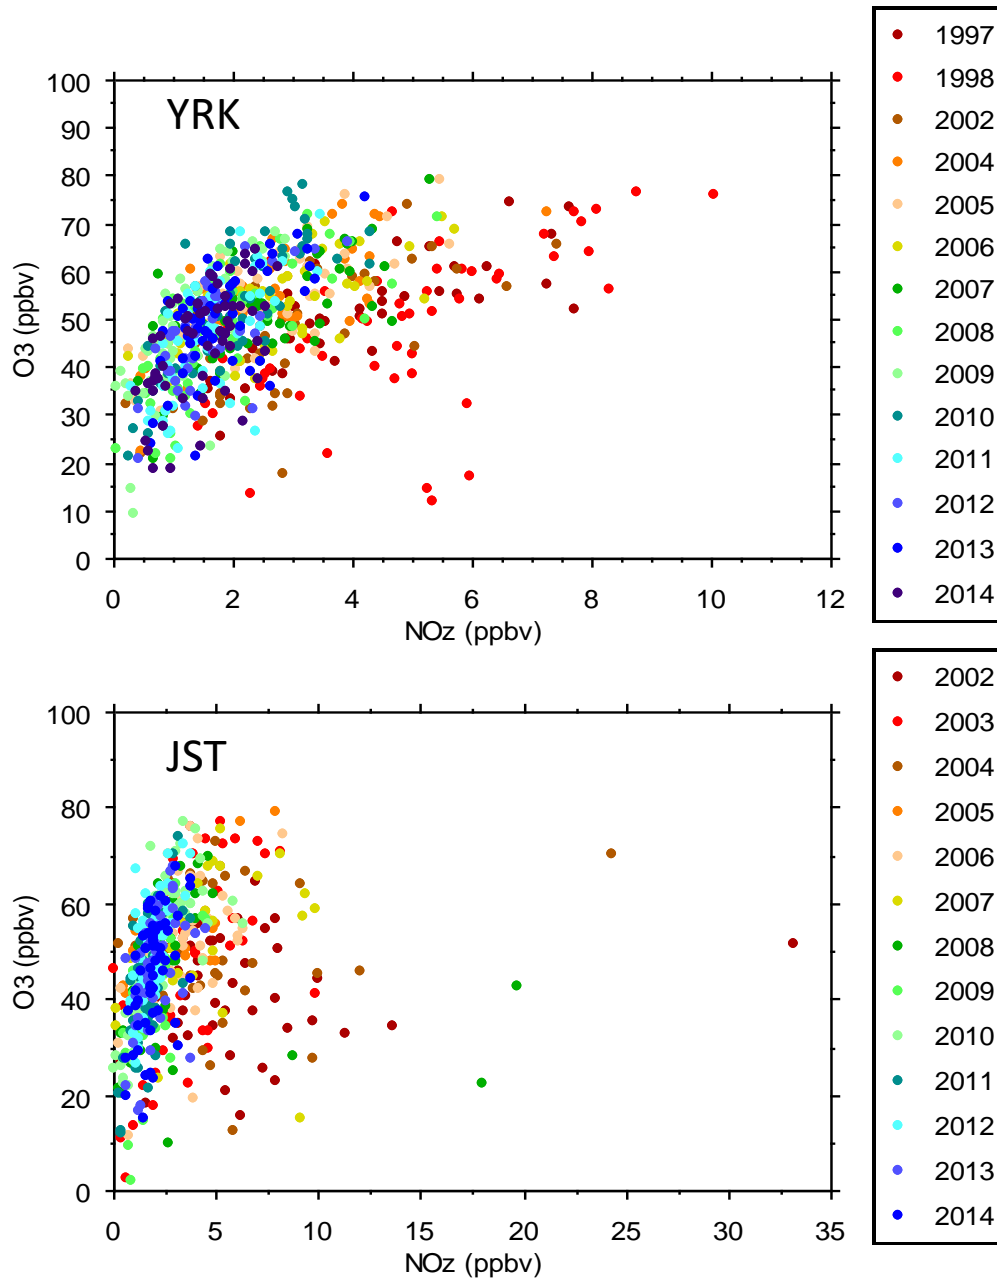

**Figure S14.** O<sub>3</sub> vs. NO<sub>z</sub> during April and May at JST and YRK. Each point is the 2 – 3 p.m. hourly average on one day. YRK year-specific linear regressions are statistically significant ( $p < 0.0001$ ) for all years. Example slopes are  $4.85 \pm 0.64$  (1 SE) in 1997,  $5.89 \pm 0.79$  in 2005,  $8.95 \pm 1.46$  in 2013, and  $10.3 \pm 2.0$  in 2014. JST year-specific linear regressions are statistically significant ( $p < 0.001$ ) for 2003 (slope =  $4.67 \pm 1.01$ , 1 SE), 2005 (slope =  $3.92 \pm 0.88$ ), 2006 (slope =  $3.81 \pm 0.94$ ), and 2009 – 2014 (slopes =  $9.53 \pm 1.65$  in 2009,  $8.19 \pm 0.95$  in 2010,  $9.79 \pm 1.64$  in 2012, and  $8.25 \pm 1.97$  in 2014).

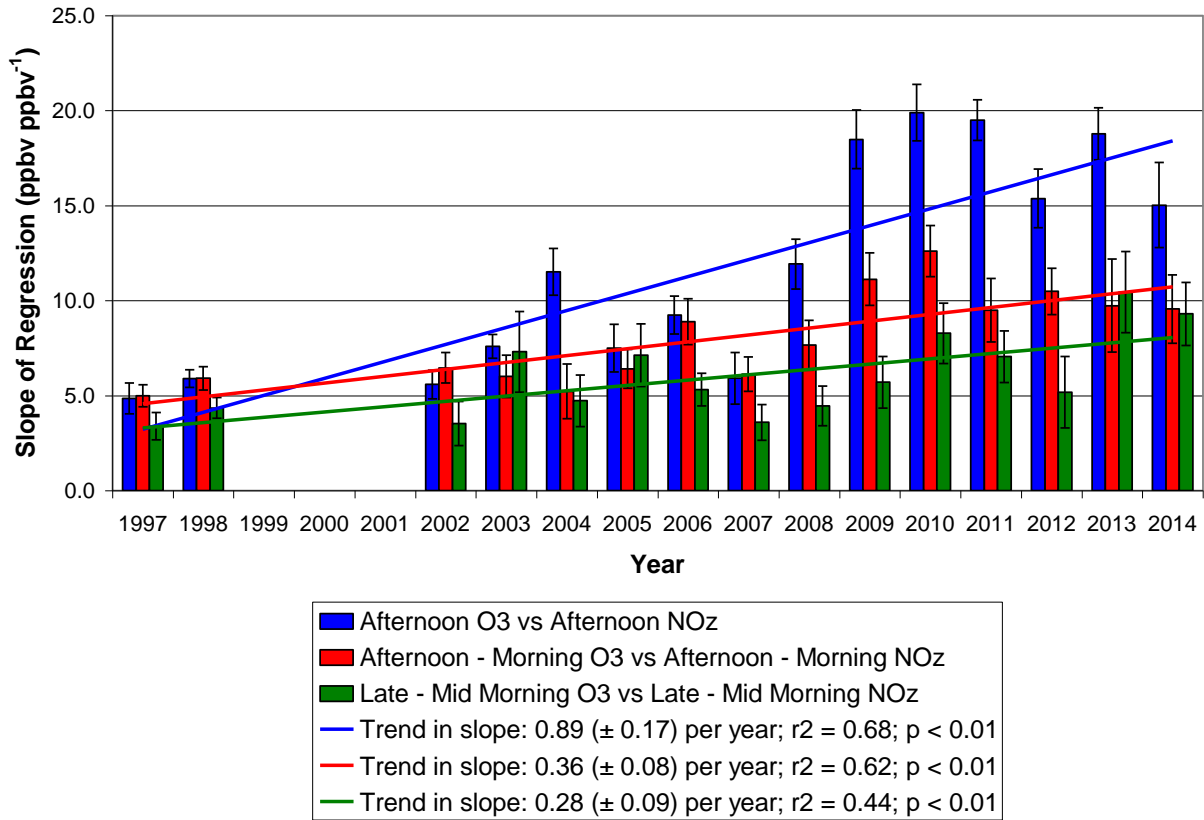

Figure S15. YRK regression slopes for year-specific regressions of June – July measurements of O<sub>3</sub> and NO<sub>z</sub>, showing comparisons among (1) afternoon (2 p.m.) O<sub>3</sub> vs. NO<sub>z</sub>, (2) afternoon – morning (2 p.m. – 10 a.m.) O<sub>3</sub> vs. NO<sub>z</sub>, and (3) late morning – mid-morning (11 a.m. – 10 a.m.) O<sub>3</sub> vs. NO<sub>z</sub>.

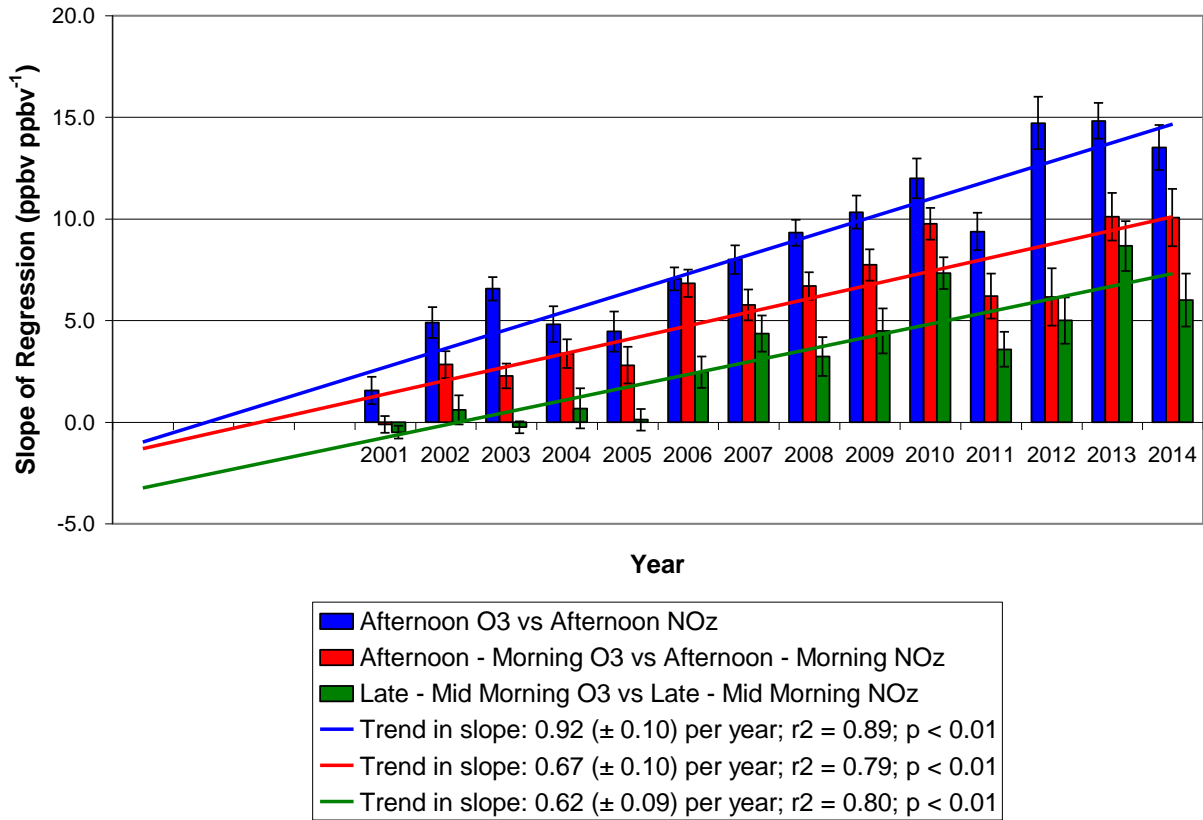

Figure S16. JST regression slopes for year-specific regressions of June – July measurements of O<sub>3</sub> and NO<sub>z</sub>, showing comparisons among (1) afternoon (2 p.m.) O<sub>3</sub> vs. NO<sub>z</sub>, (2) afternoon – morning (2 p.m. – 10 a.m.) O<sub>3</sub> vs. NO<sub>z</sub>, and (3) late morning – mid-morning (11 a.m. – 10 a.m.) O<sub>3</sub> vs. NO<sub>z</sub>.



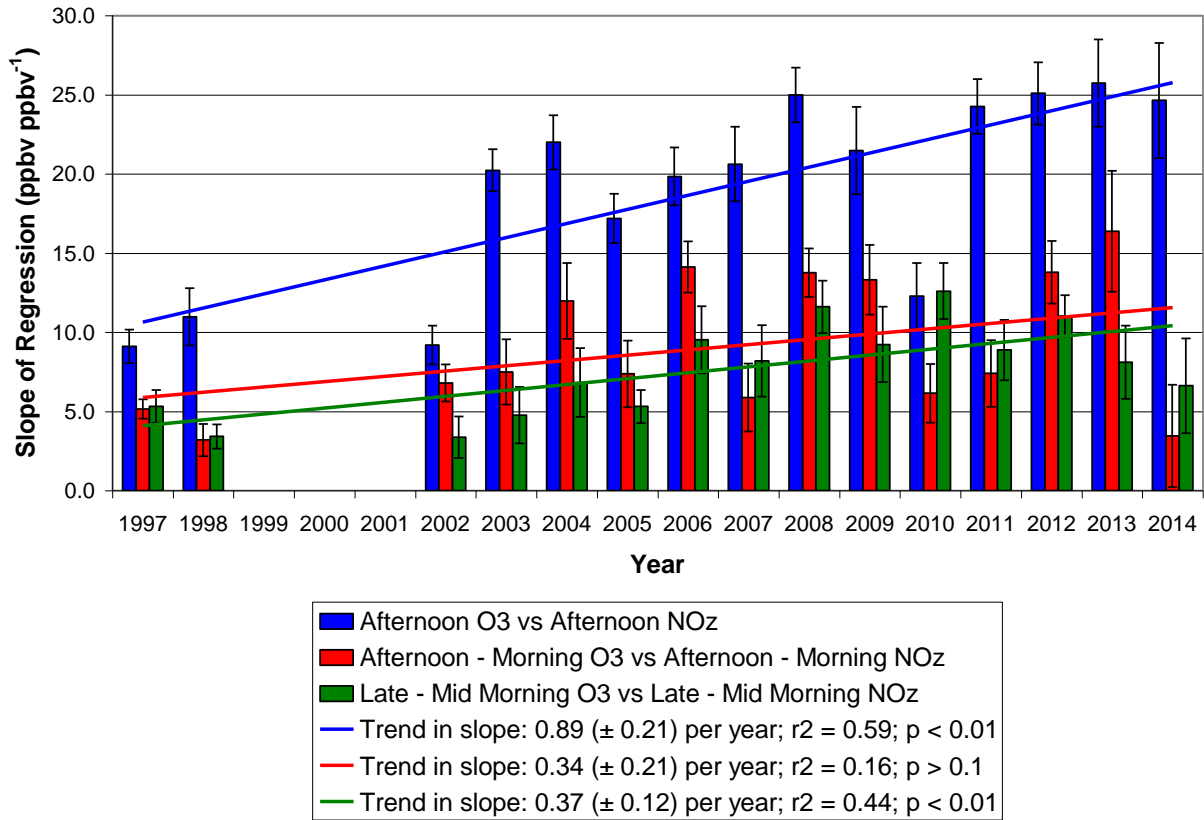

Figure S17. CTR regression slopes for year-specific regressions of June – July measurements of O<sub>3</sub> and NO<sub>z</sub>, showing comparisons among (1) afternoon (2 p.m.) O<sub>3</sub> vs. NO<sub>z</sub>, (2) afternoon – morning (2 p.m. – 10 a.m.) O<sub>3</sub> vs. NO<sub>z</sub>, and (3) late morning – mid-morning (11 a.m. – 10 a.m.) O<sub>3</sub> vs. NO<sub>z</sub>.

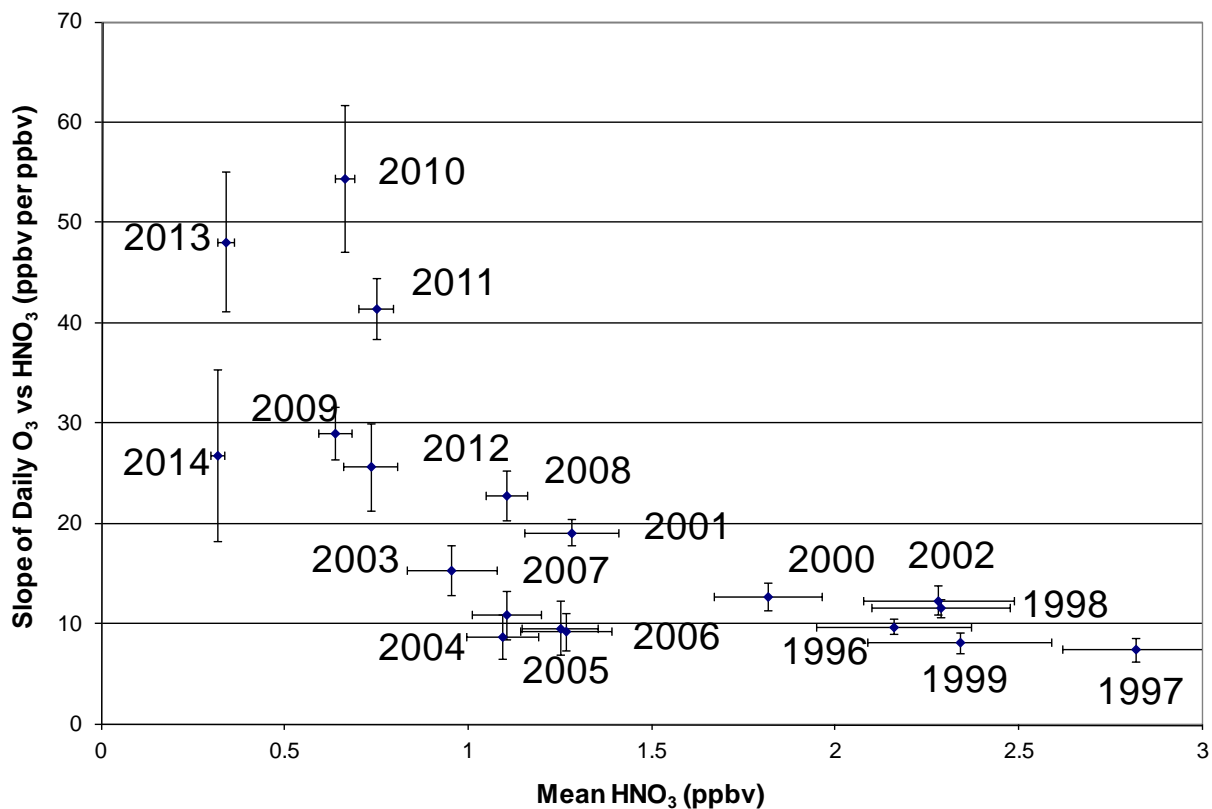

**Figure S18.** Summer observed OPE computed as slope of daily (2 p.m.) O<sub>3</sub> and HNO<sub>3</sub> vs. mean (2 p.m.) HNO<sub>3</sub> at YRK. Vertical and horizontal error bars are one standard error of the regression slopes and one standard error of the HNO<sub>3</sub> means, respectively.

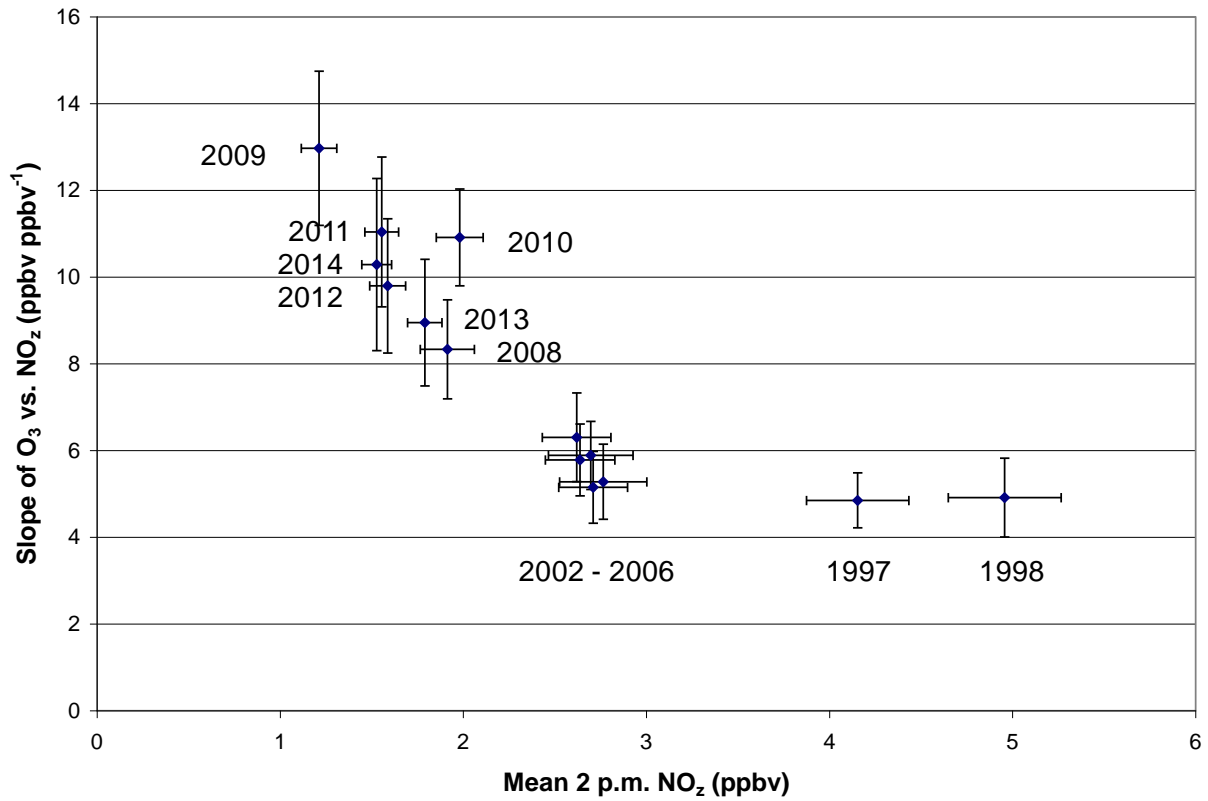

**Figure S19.** Spring observed OPE computed as slope of daily (2 p.m.) O<sub>3</sub> regressed against NO<sub>z</sub> vs. mean (2 p.m.) NO<sub>z</sub> at YRK. Vertical and horizontal error bars are one standard error of the regression slopes and one standard error of the NO<sub>z</sub> means, respectively.

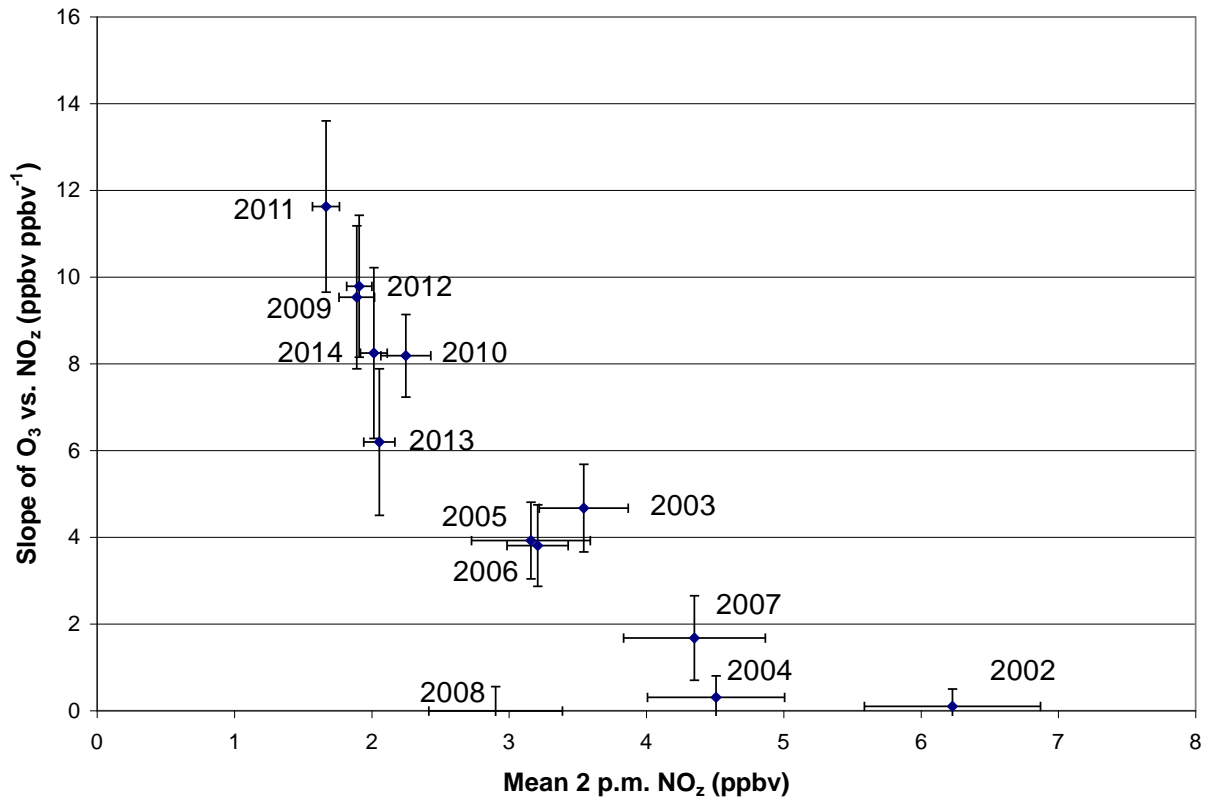

**Figure S20.** Spring observed OPE computed as slope of daily (2 p.m.) O<sub>3</sub> regressed against NO<sub>z</sub> vs. mean (2 p.m.) NO<sub>z</sub> at JST. Vertical and horizontal error bars are one standard error of the regression slopes and one standard error of the NO<sub>z</sub> means, respectively.
